# Supplementary material for: Contrasting origin of B chromosomes in two cervids (Siberian roe deer and grey brocket deer) unravelled by chromosome-specific DNA sequencing
Source: PubMed Central journal article supplement (PMC4982142; doi:10.1186/s12864-016-2933-6), 2016-08-11

CFA12

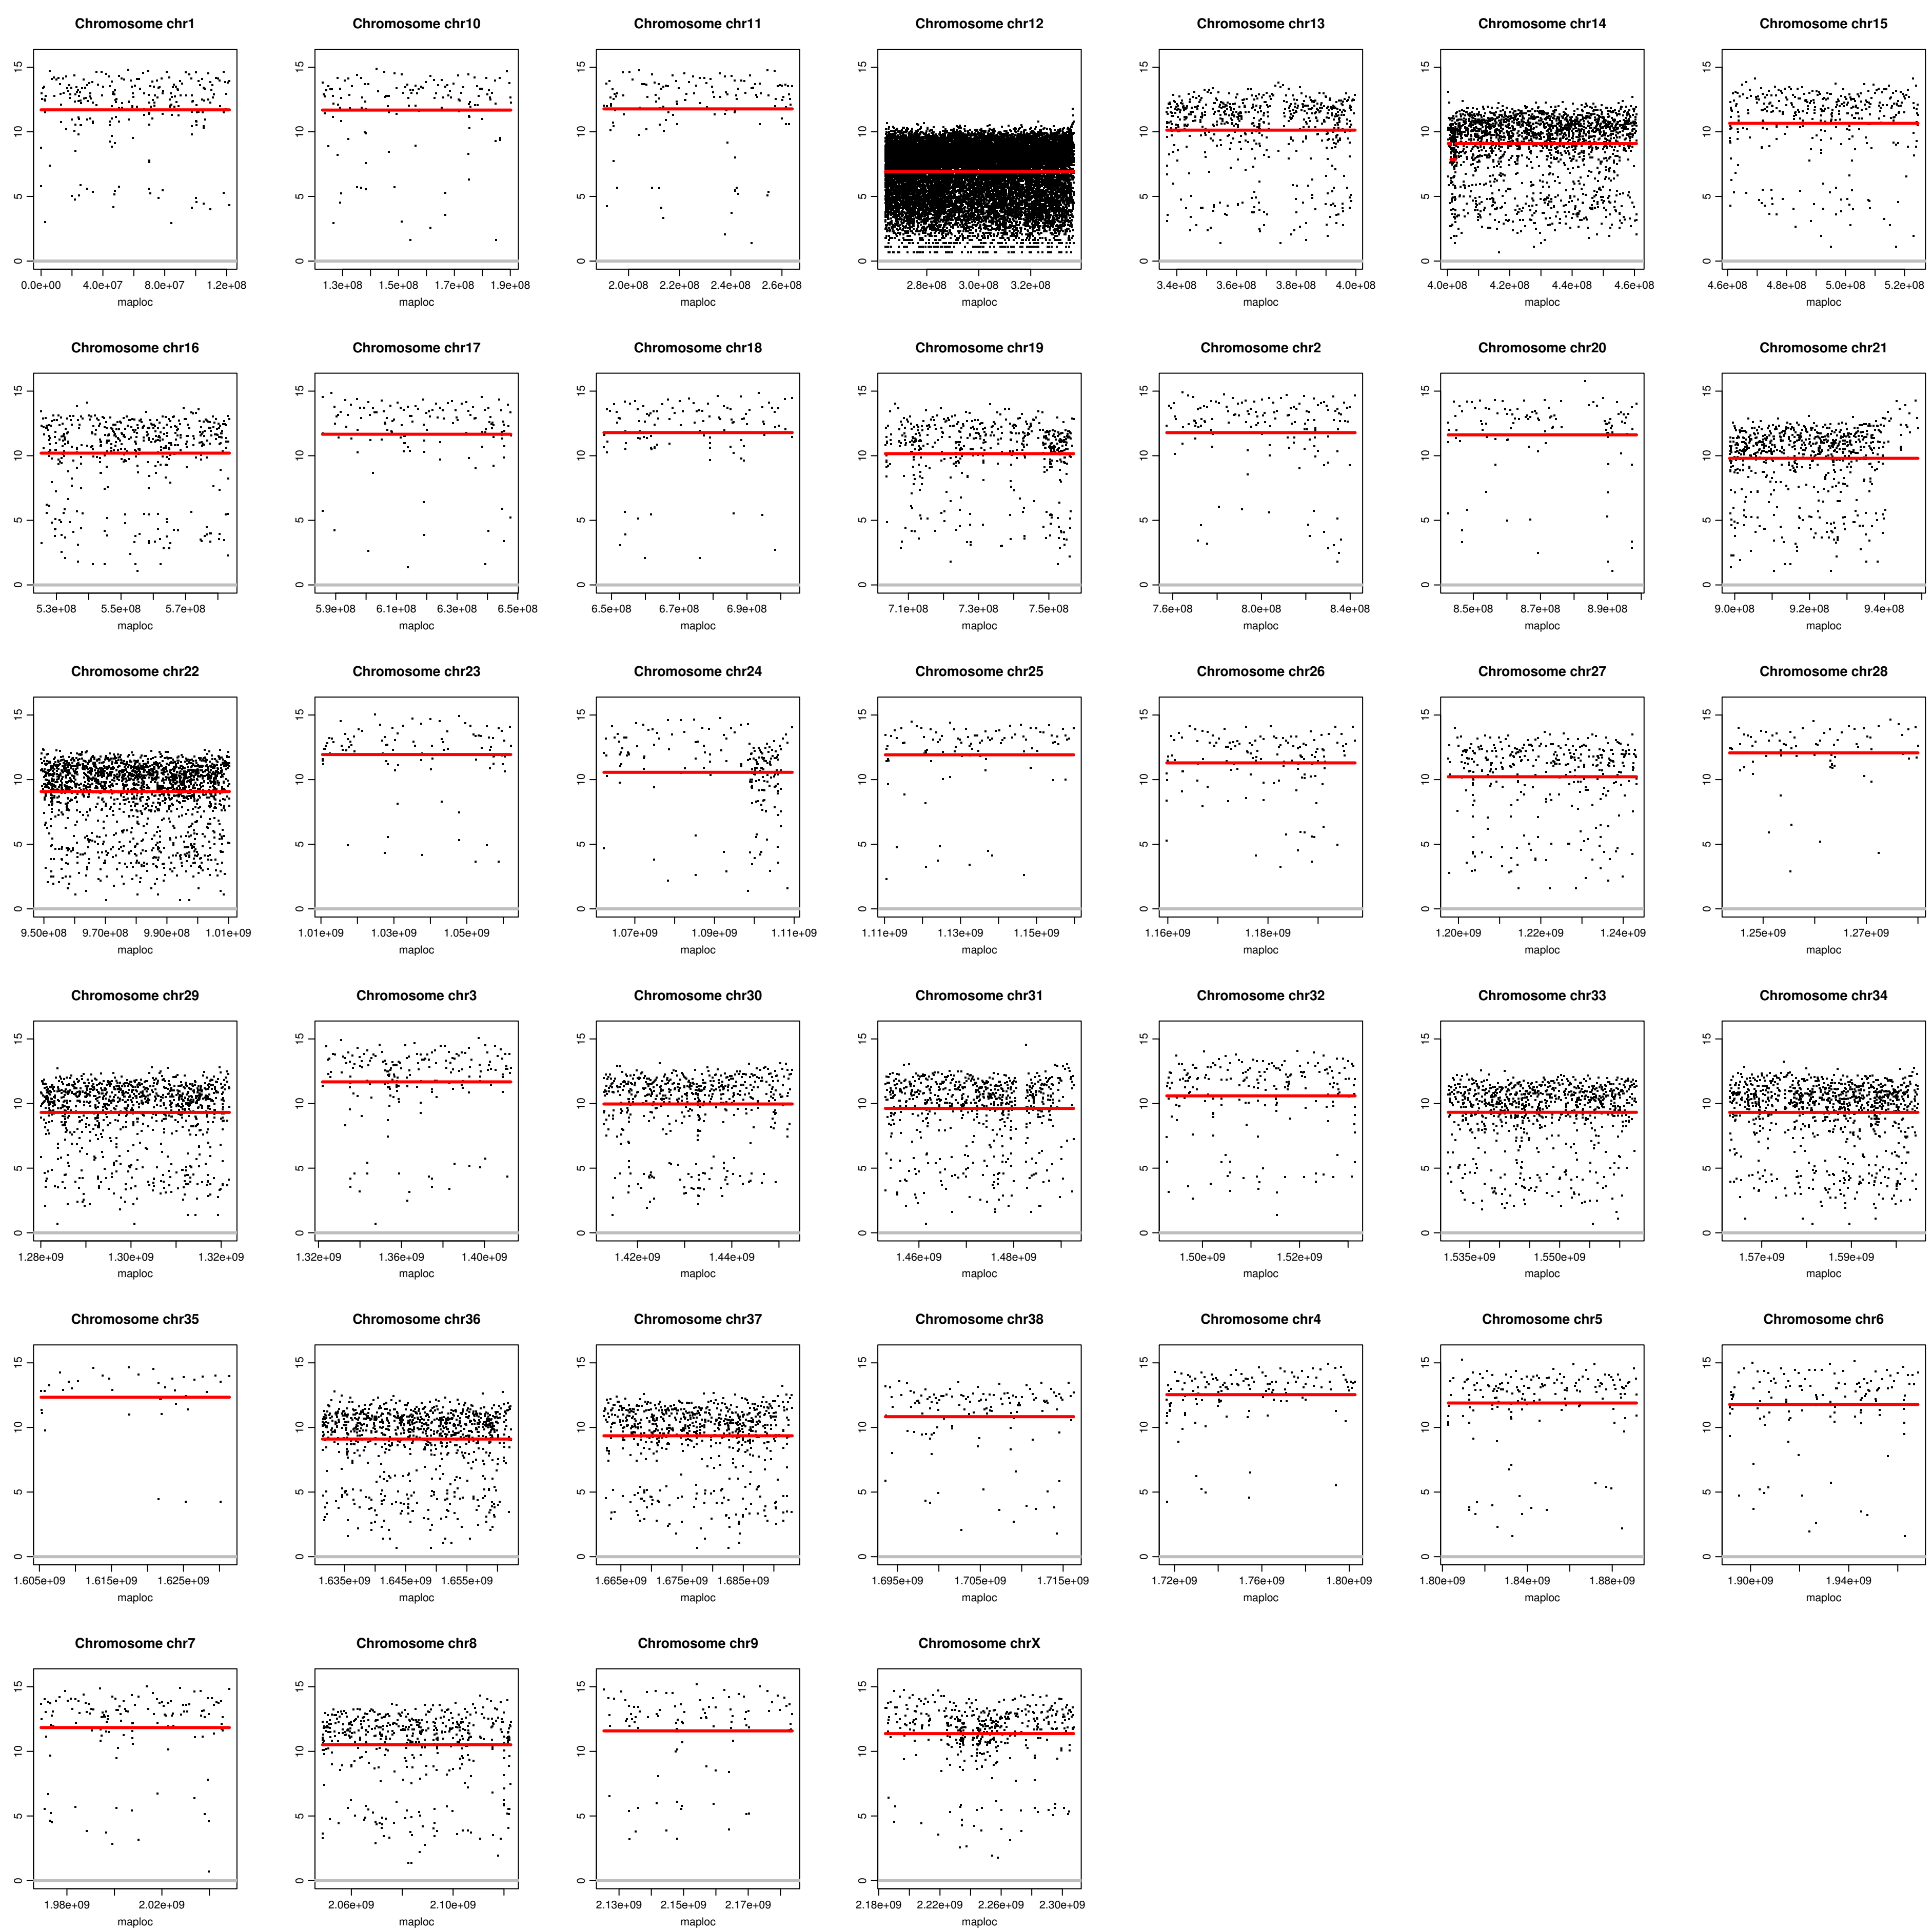

BTAMix

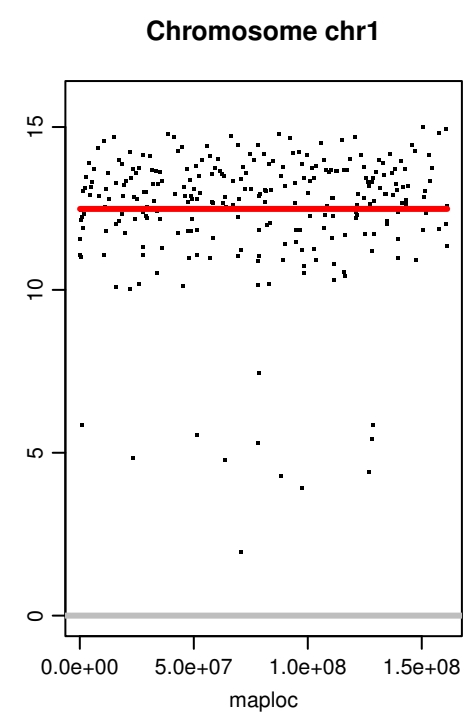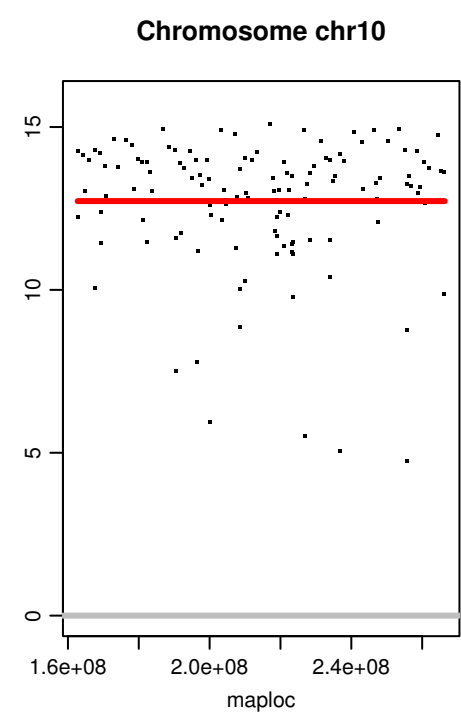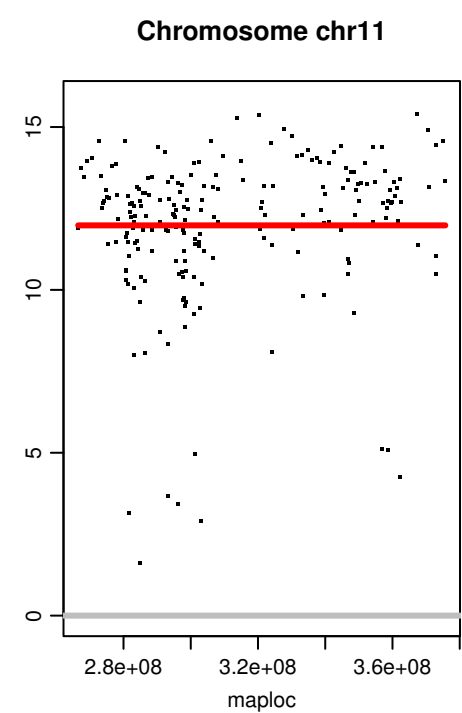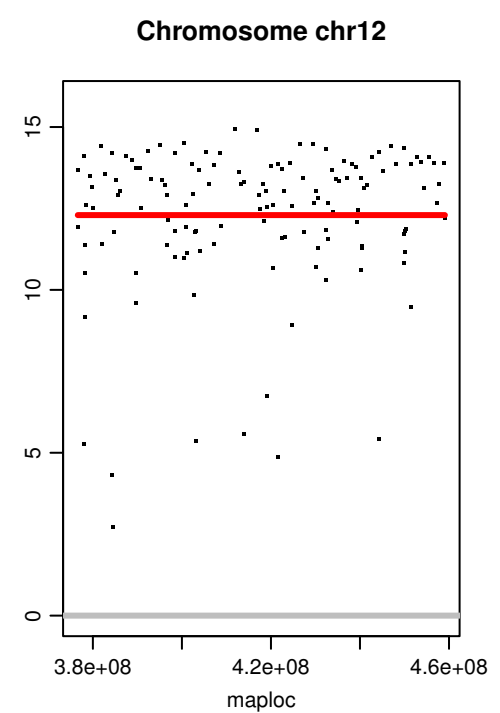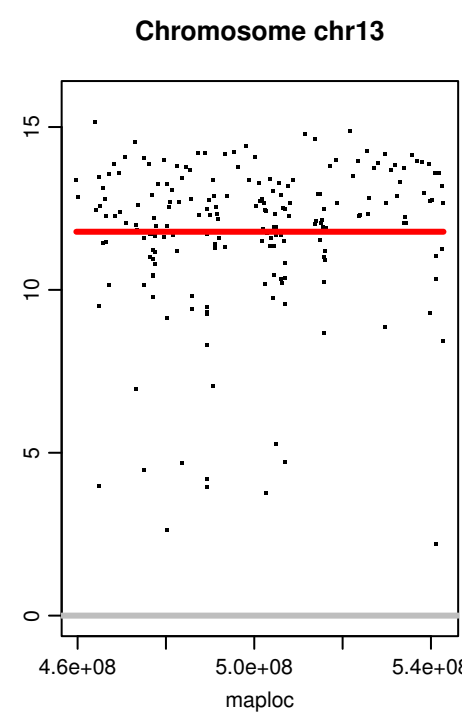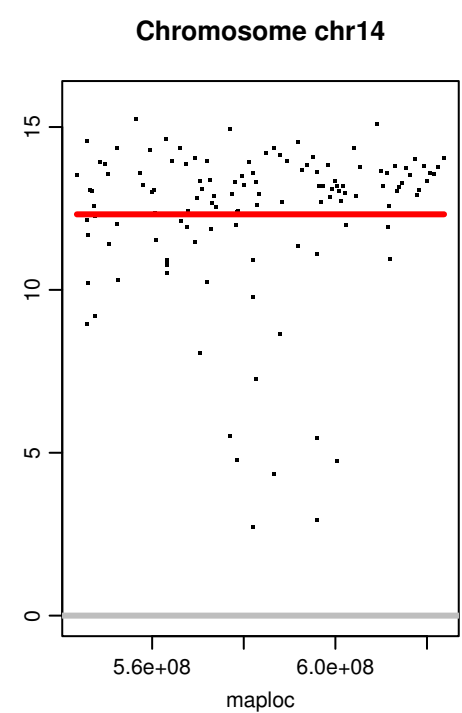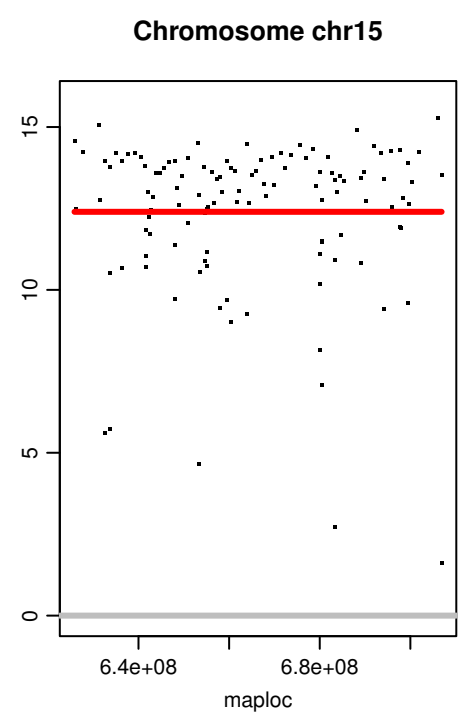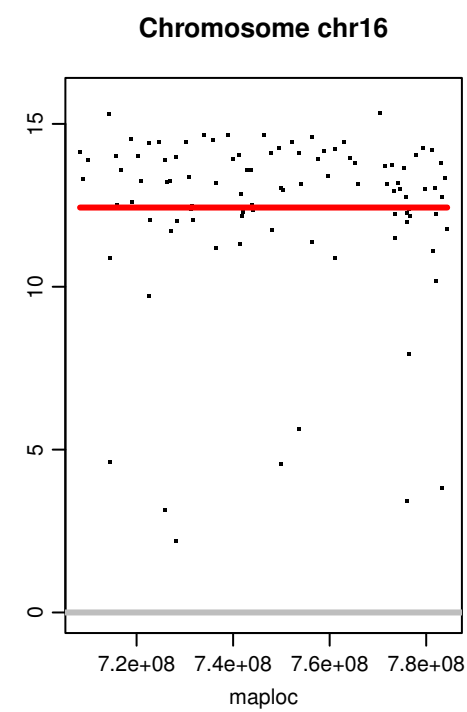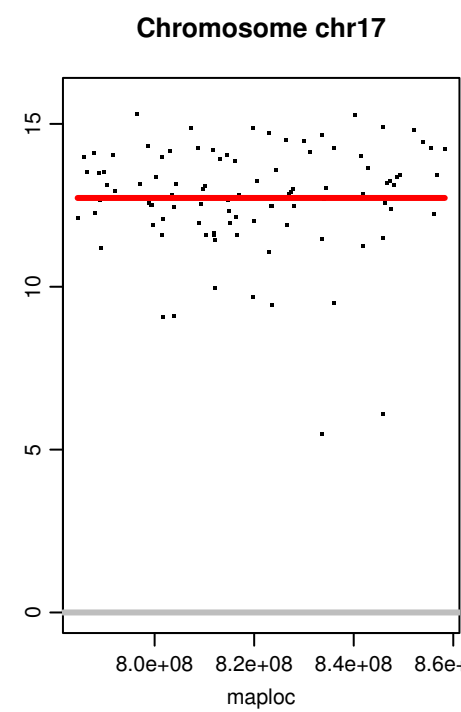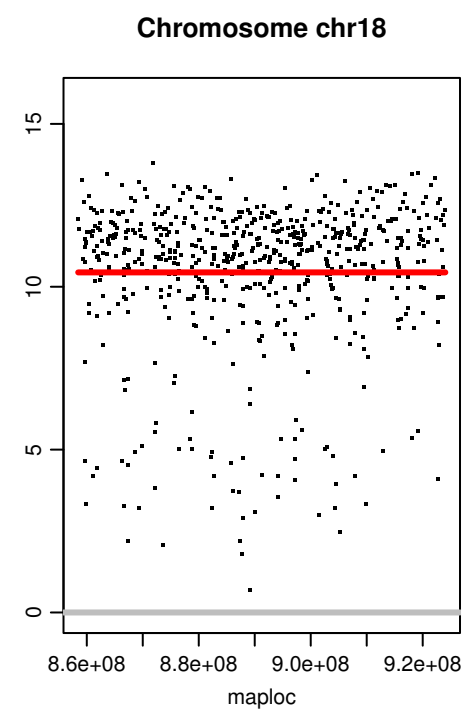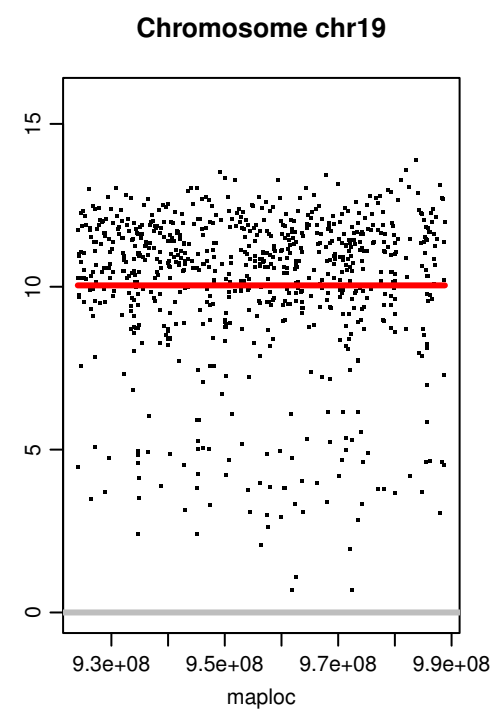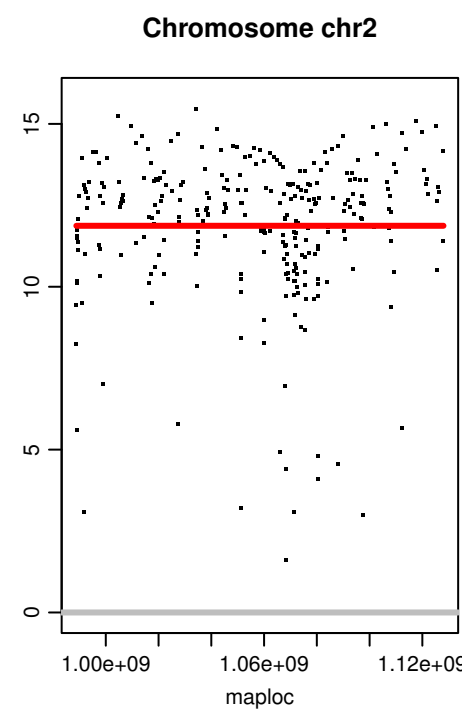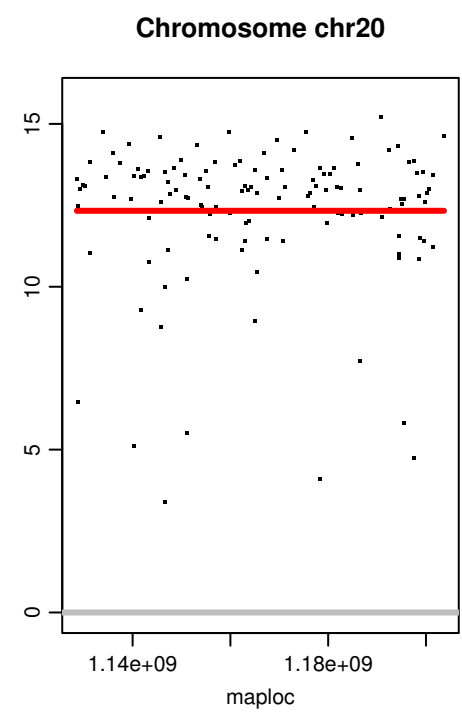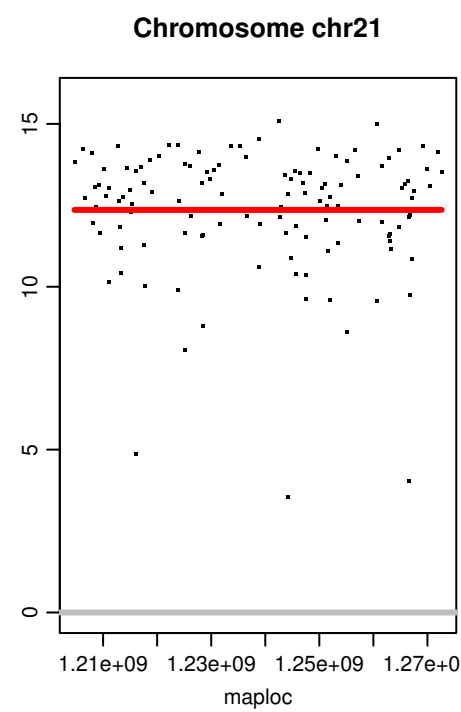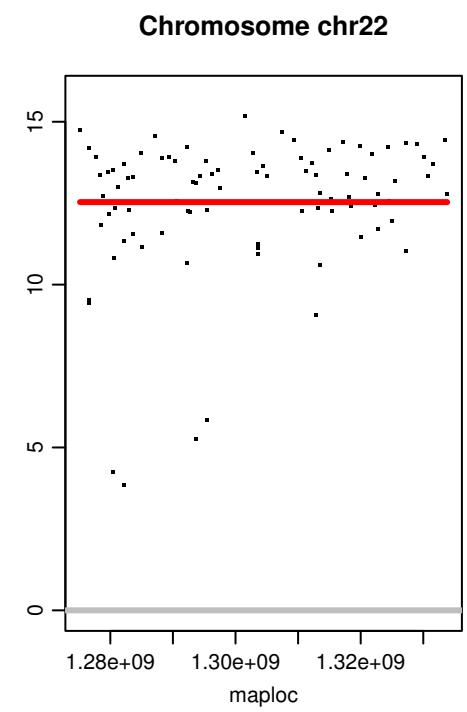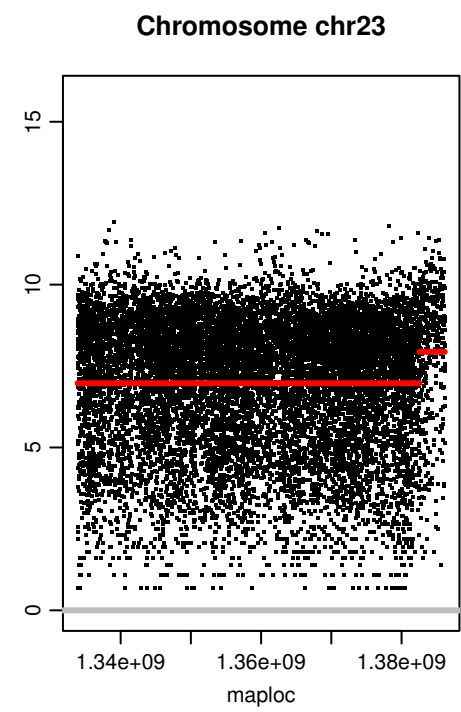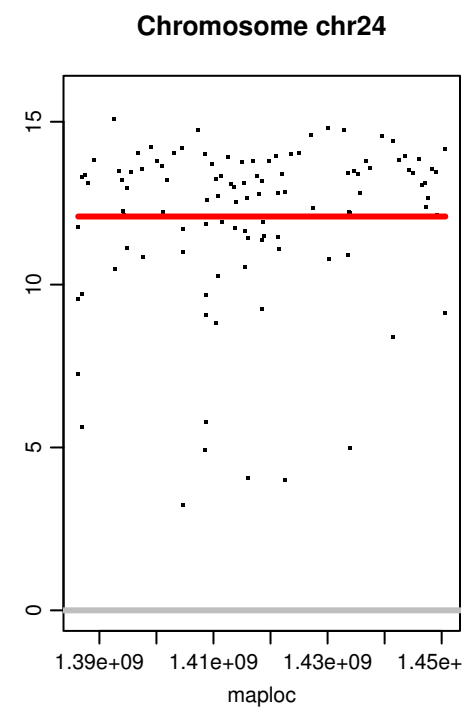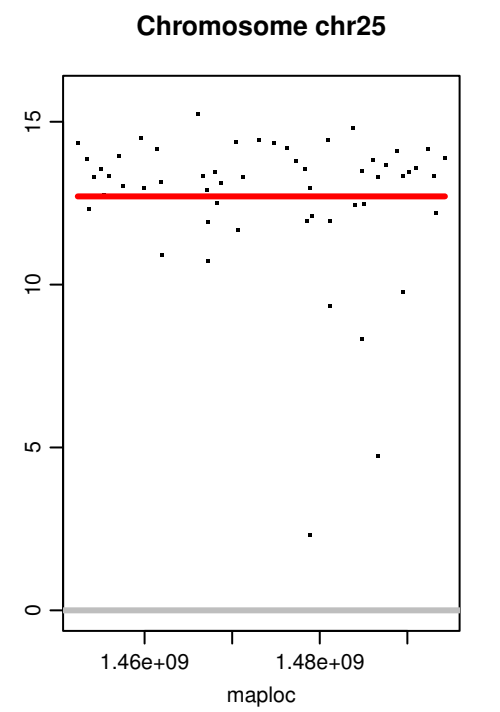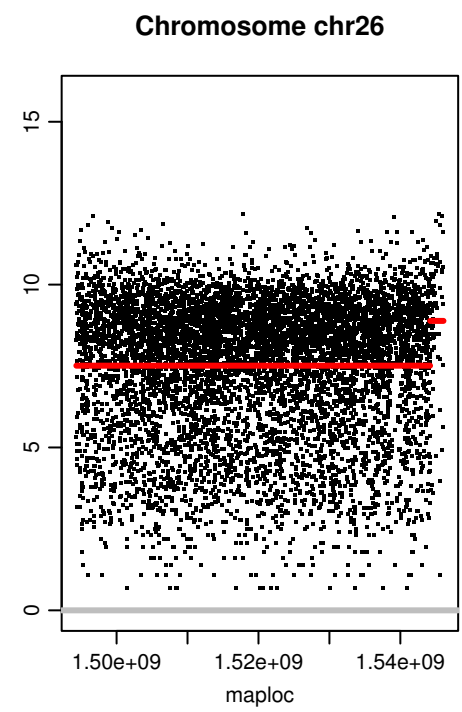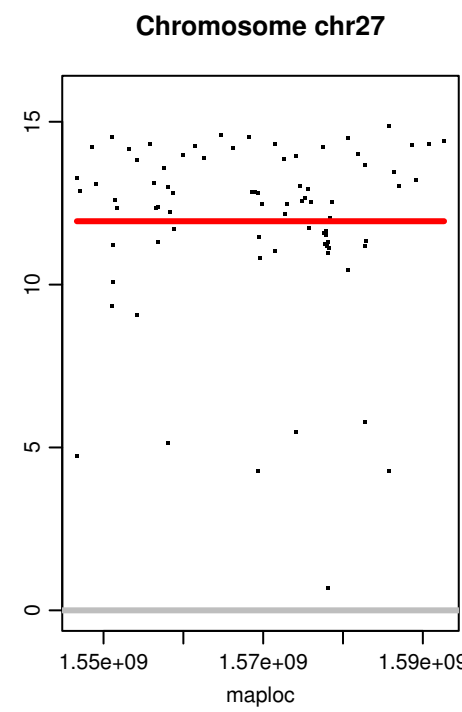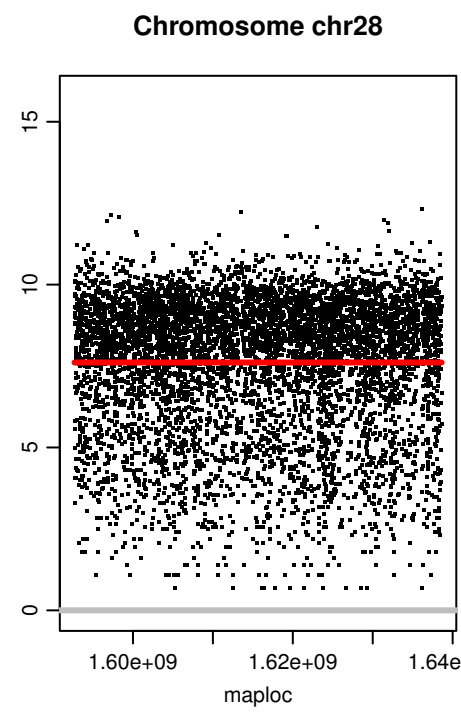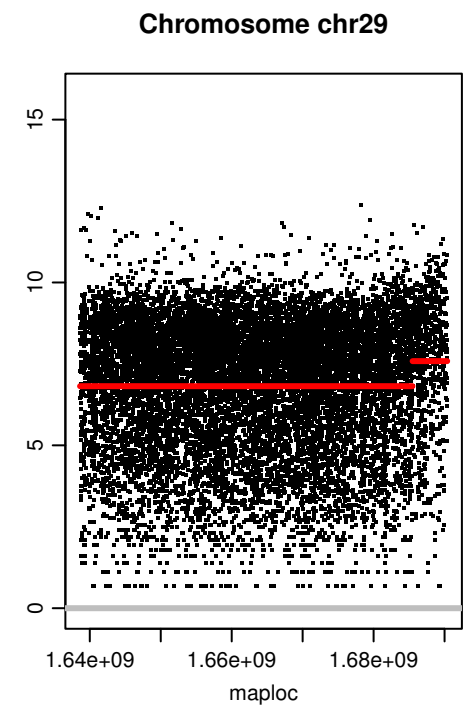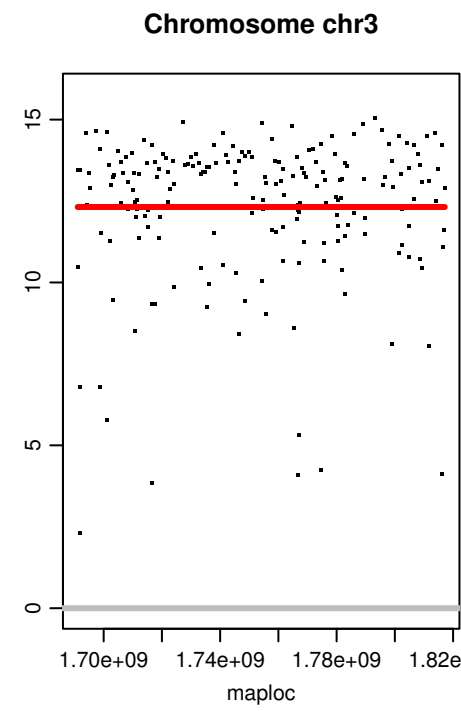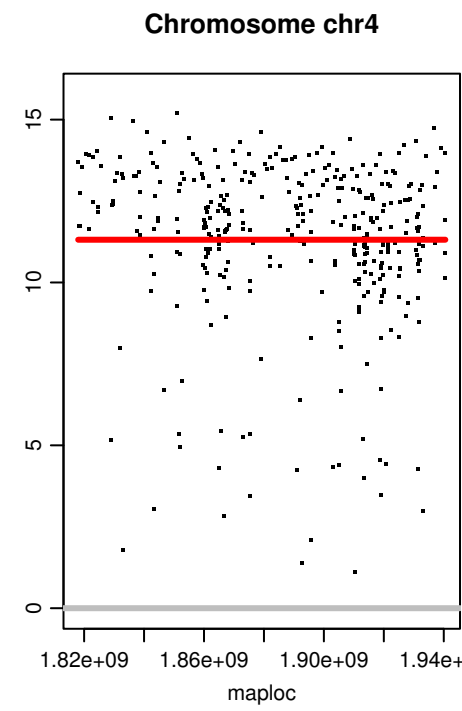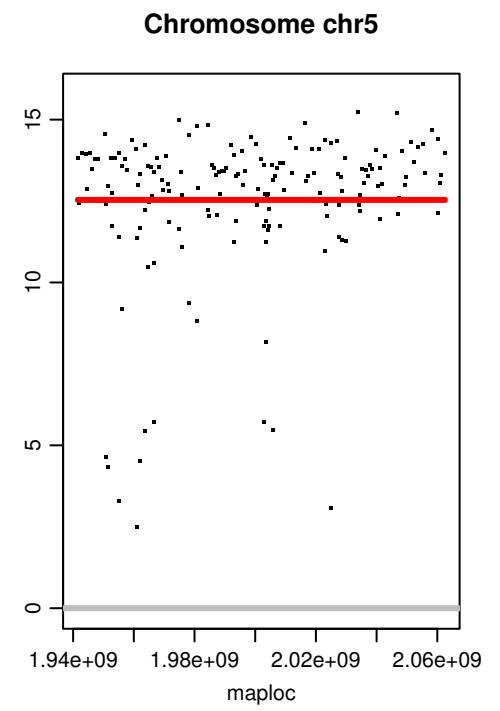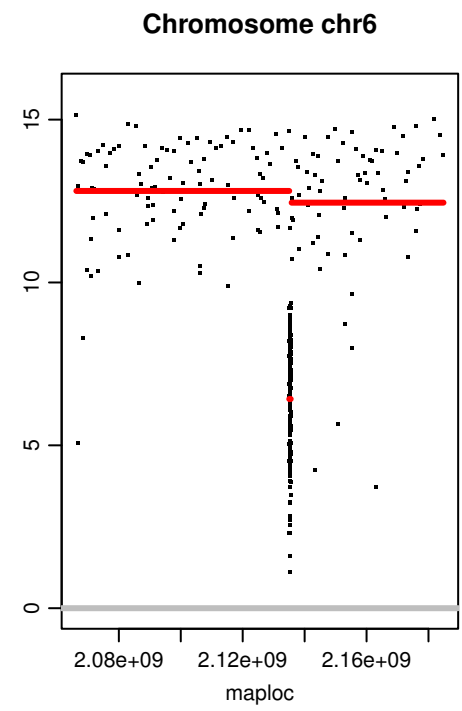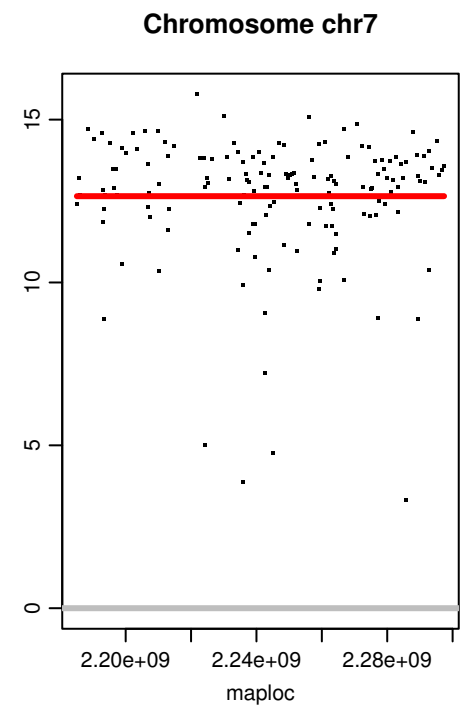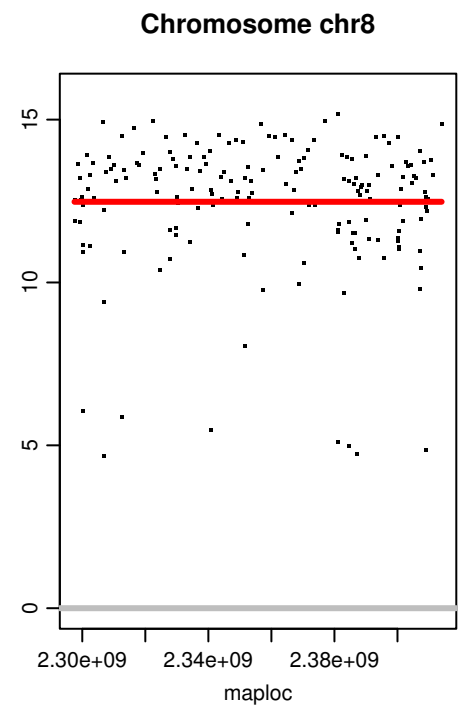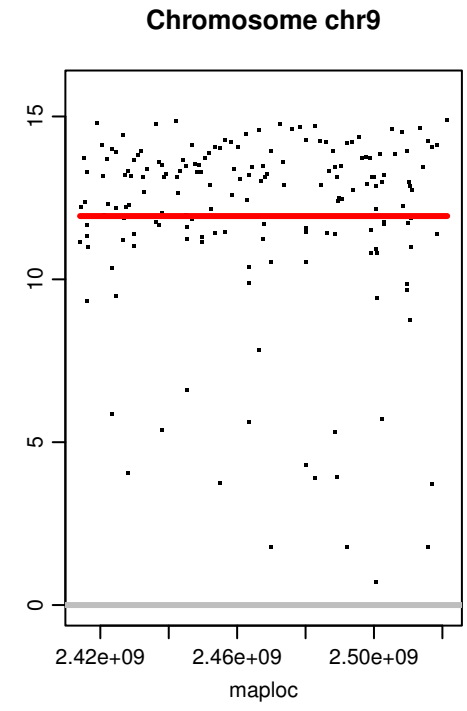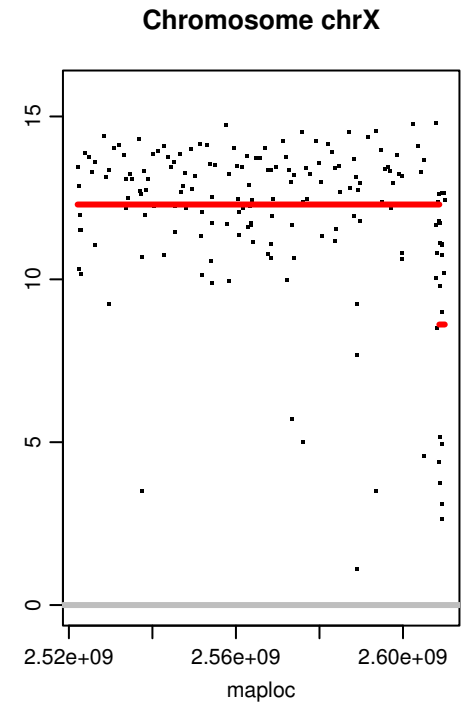

CPYB1

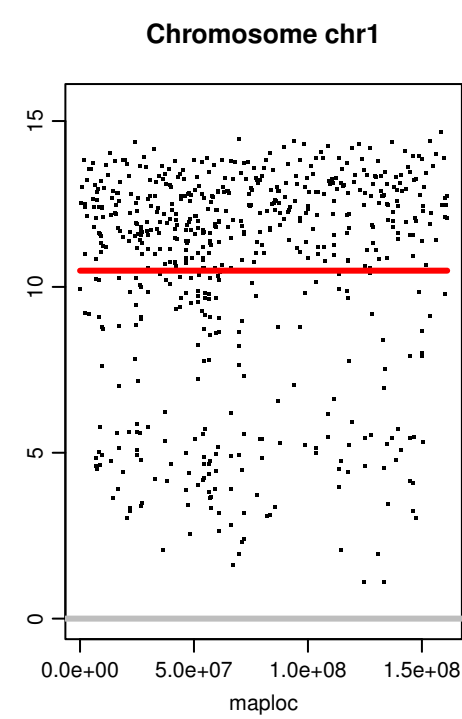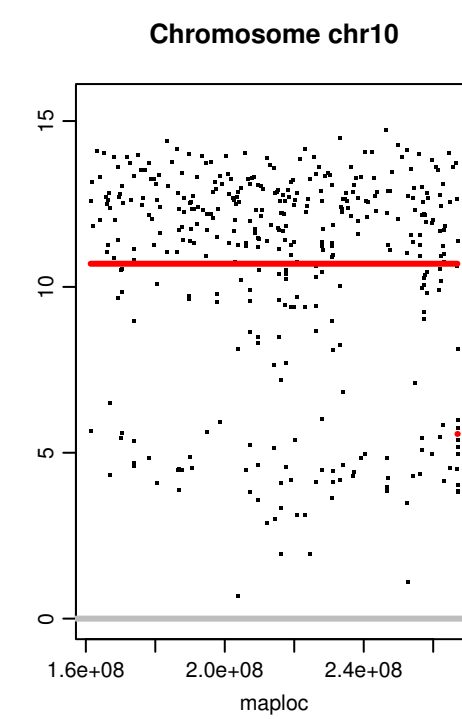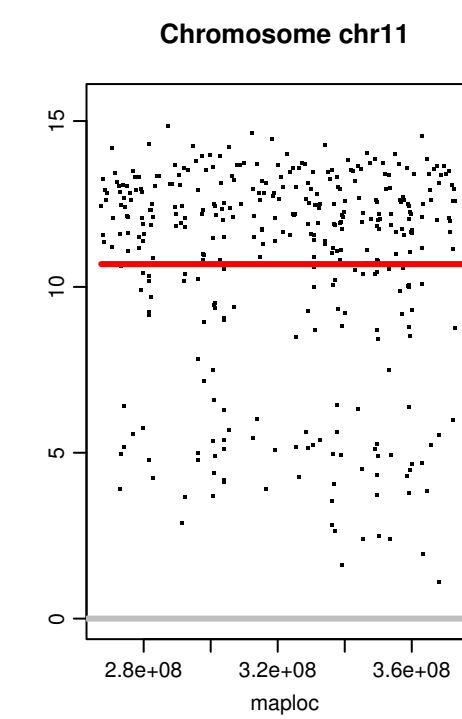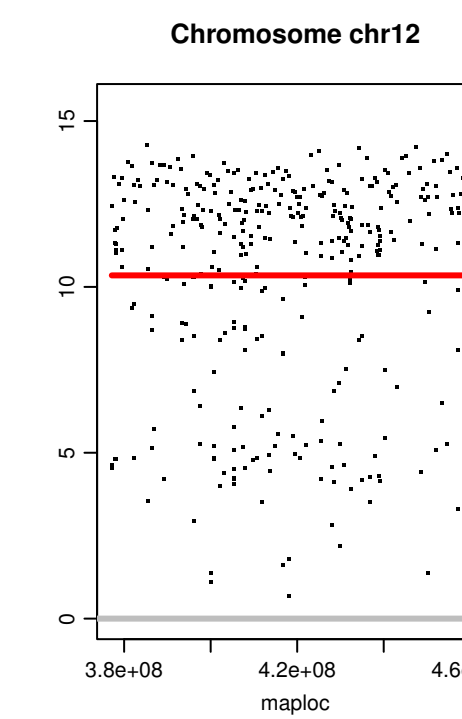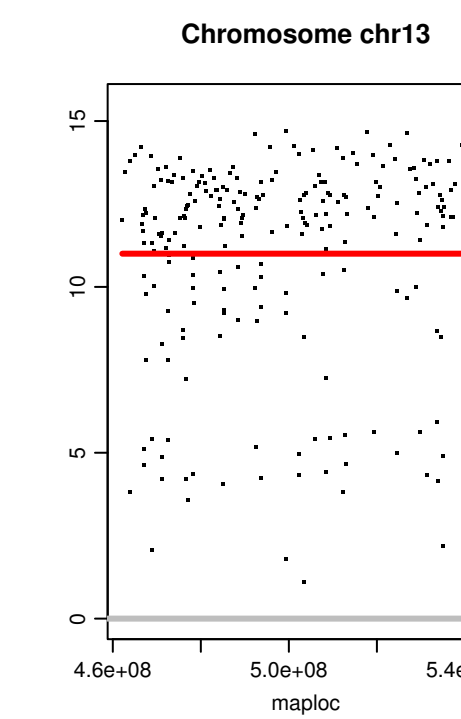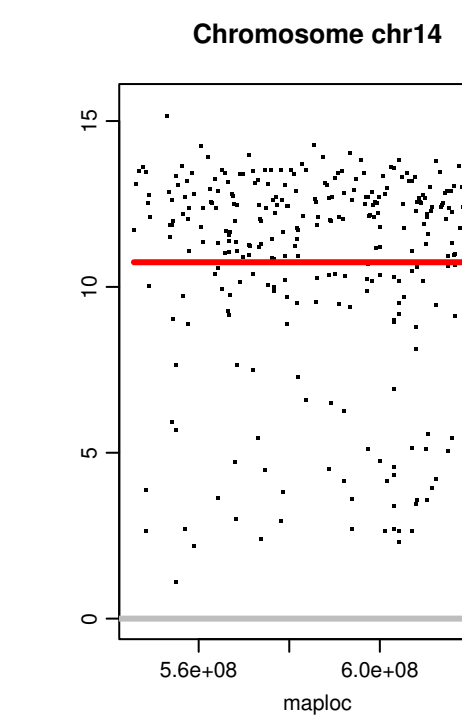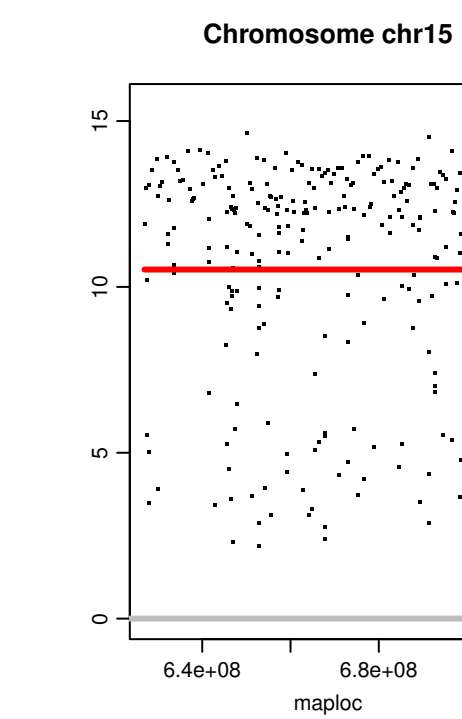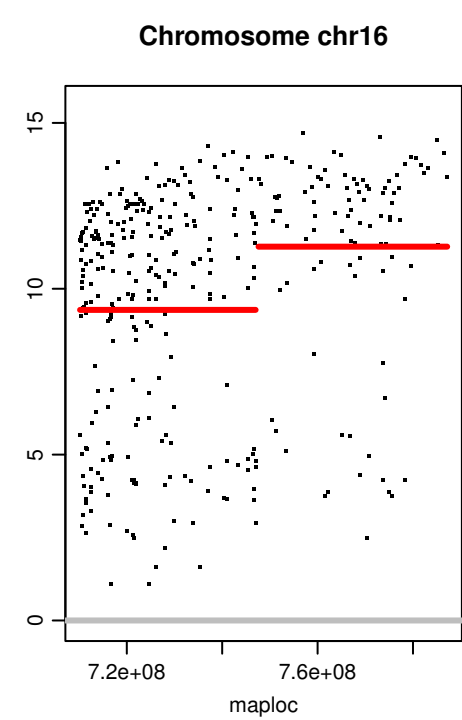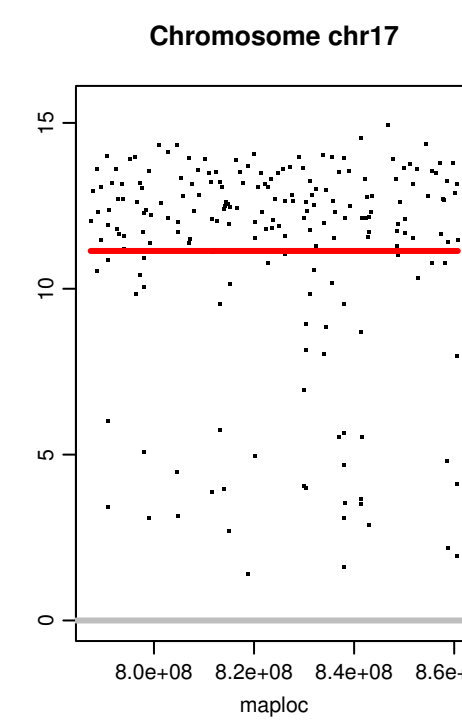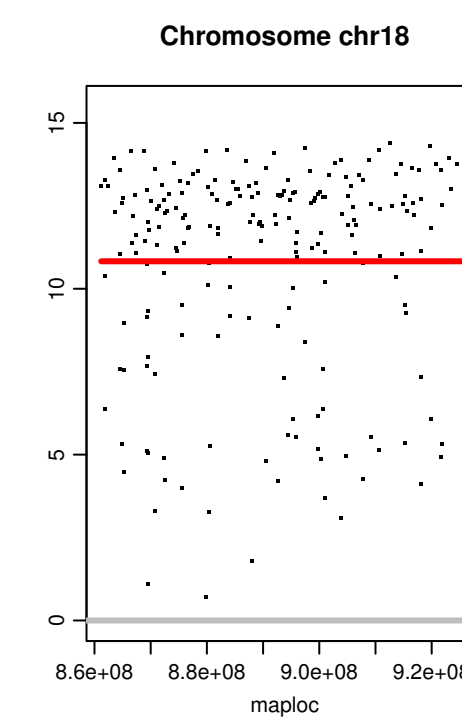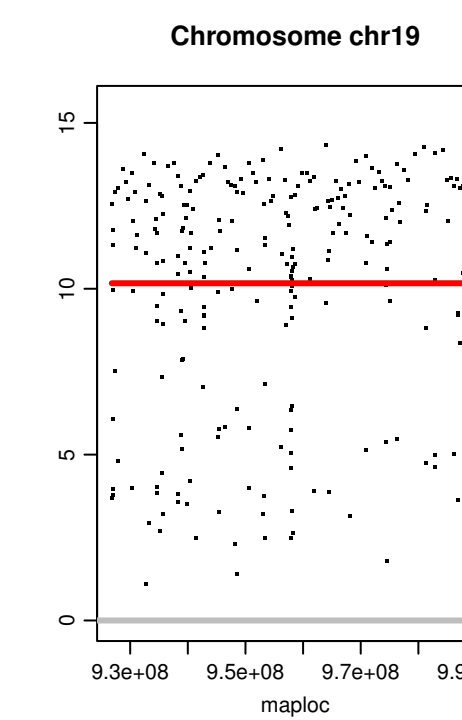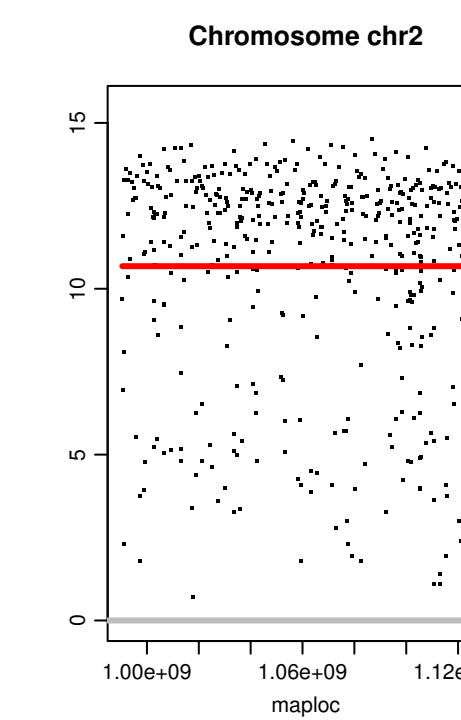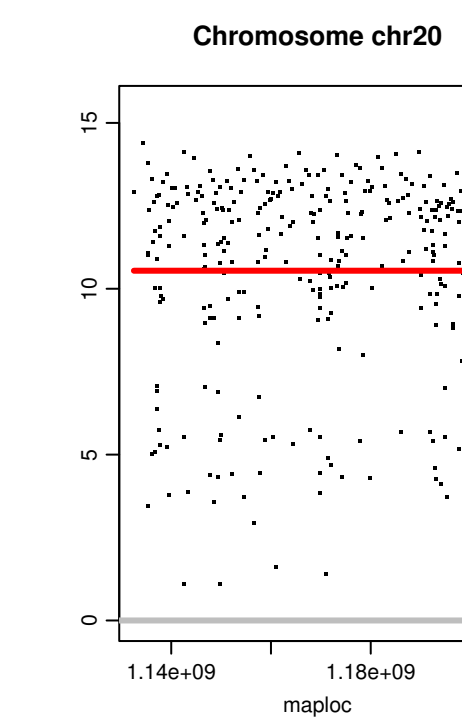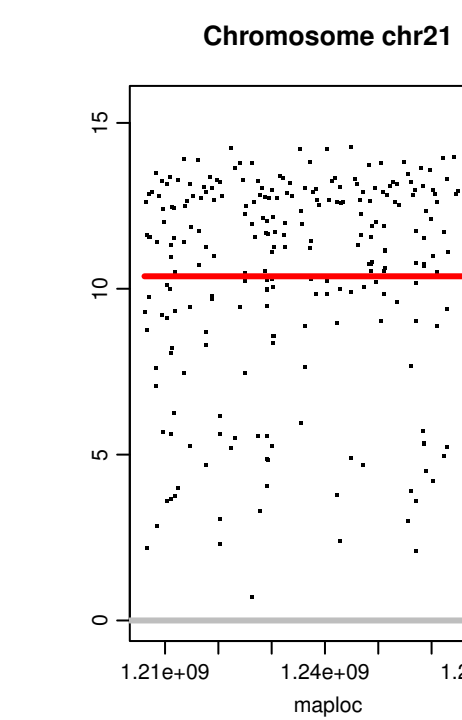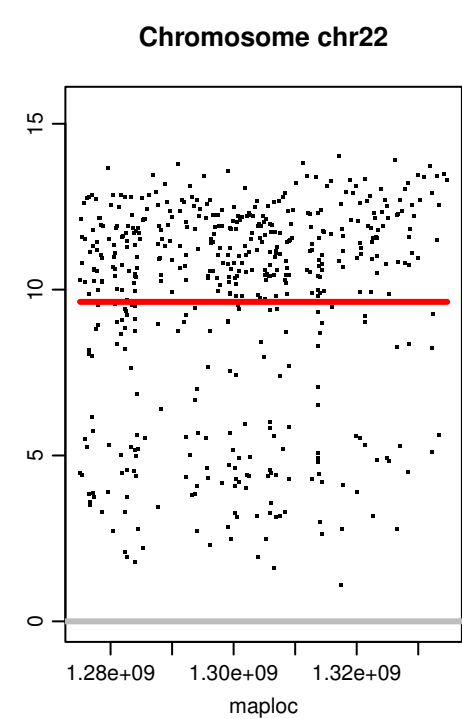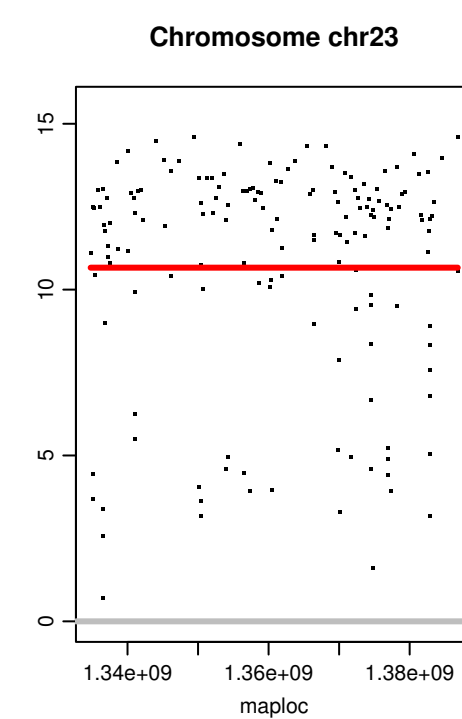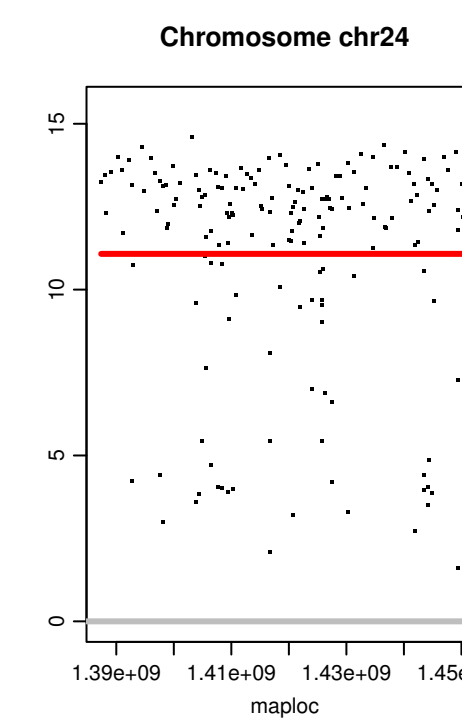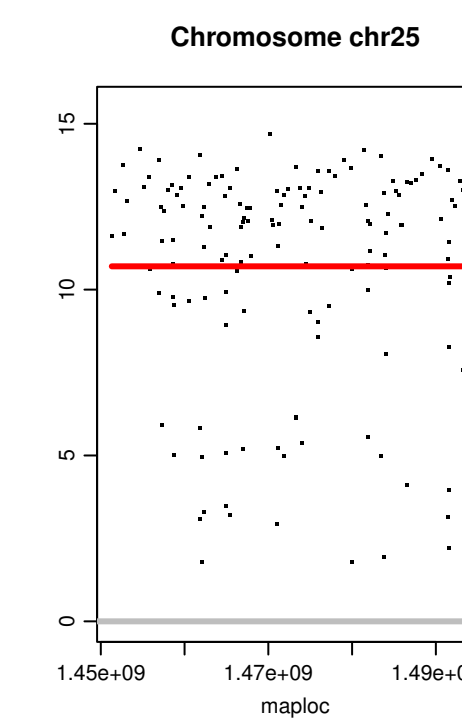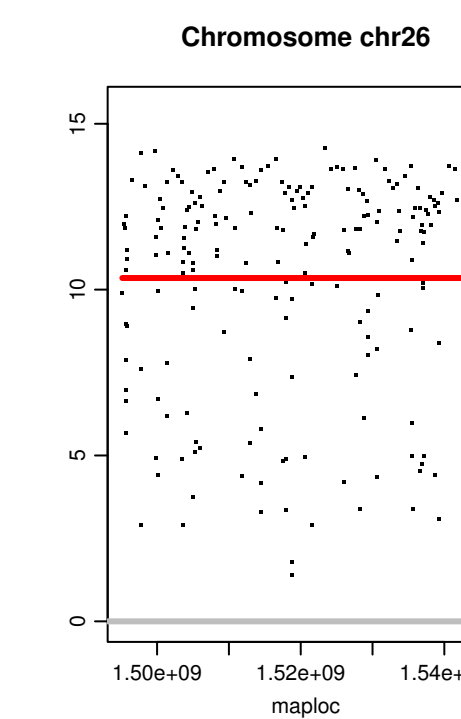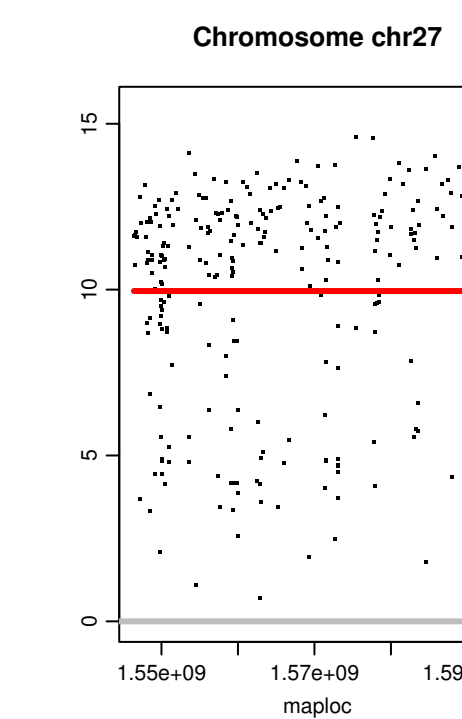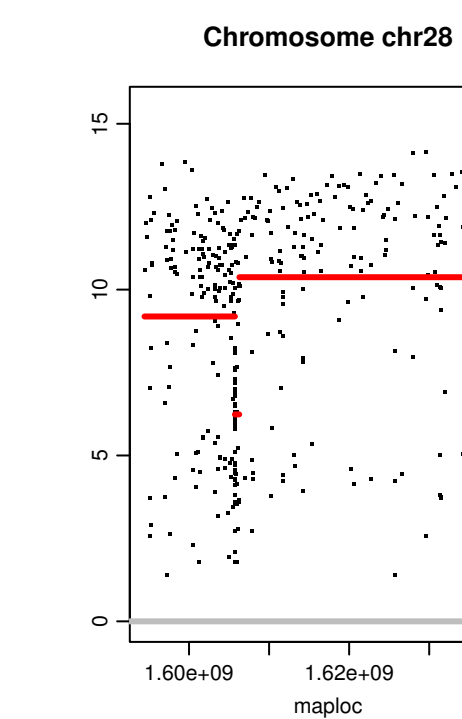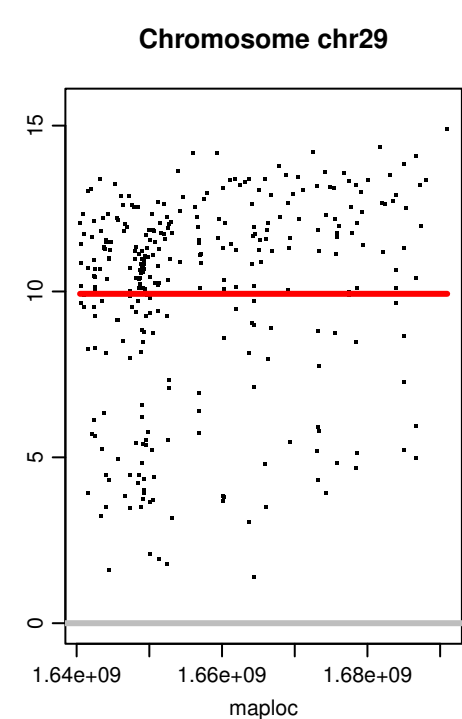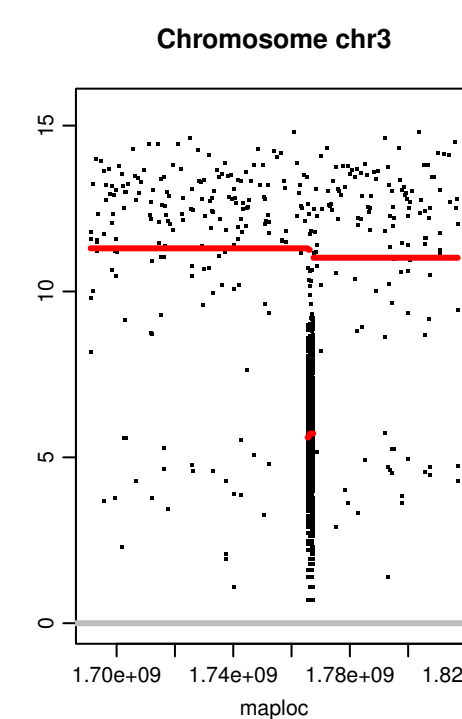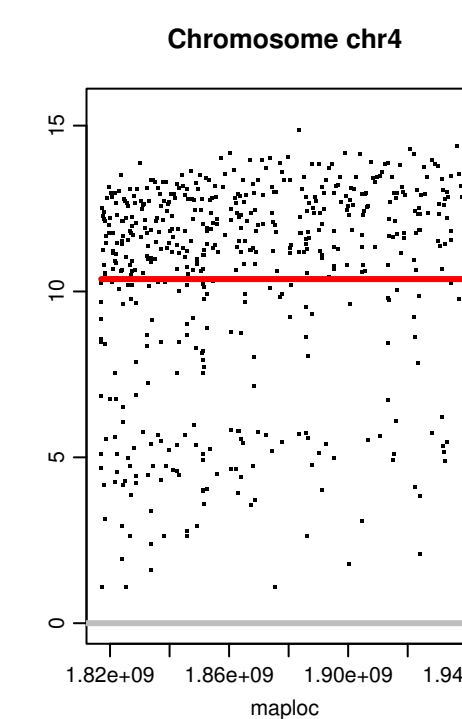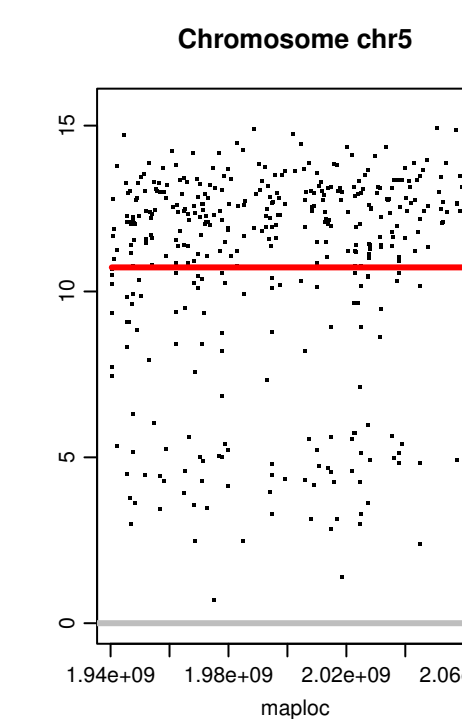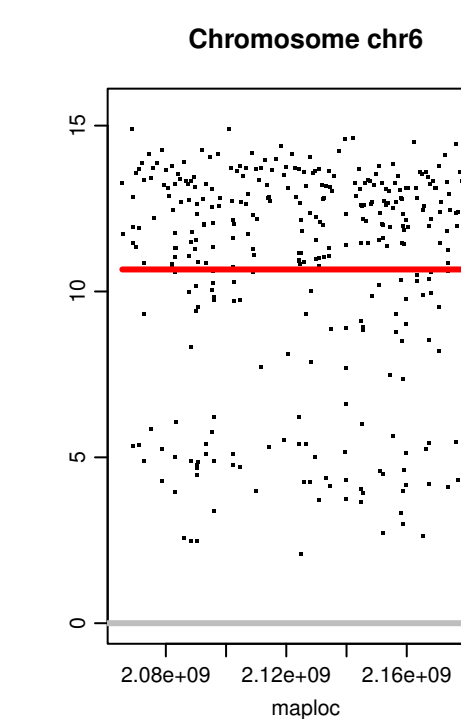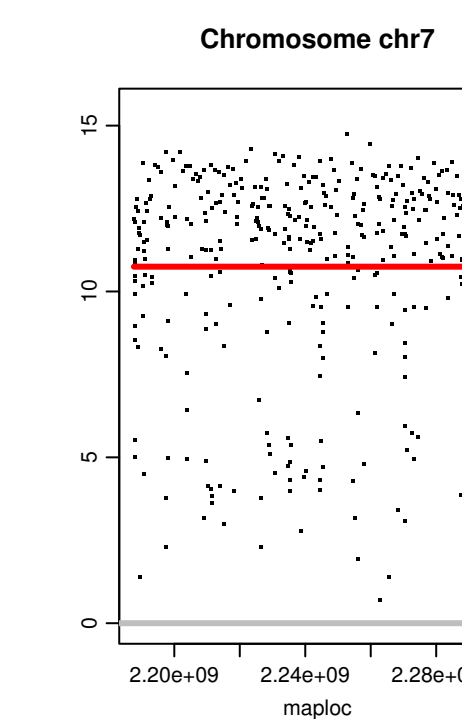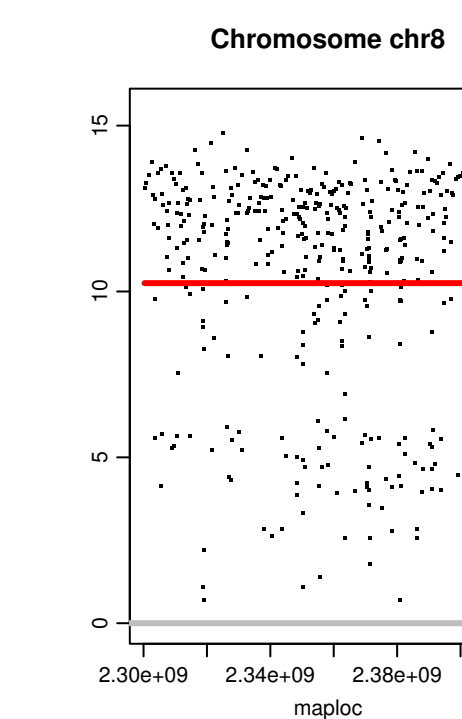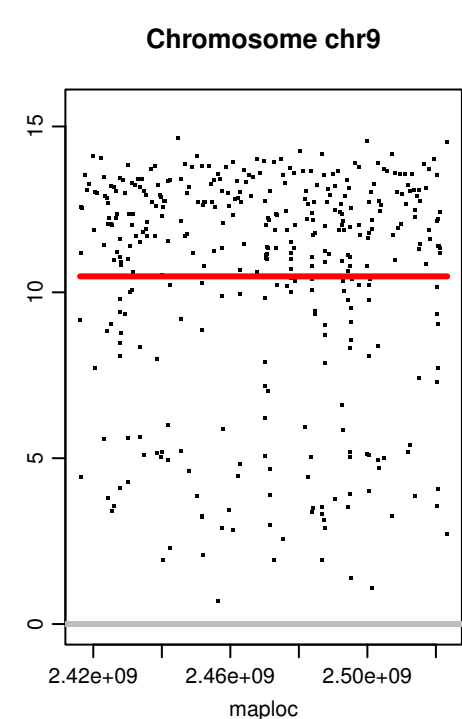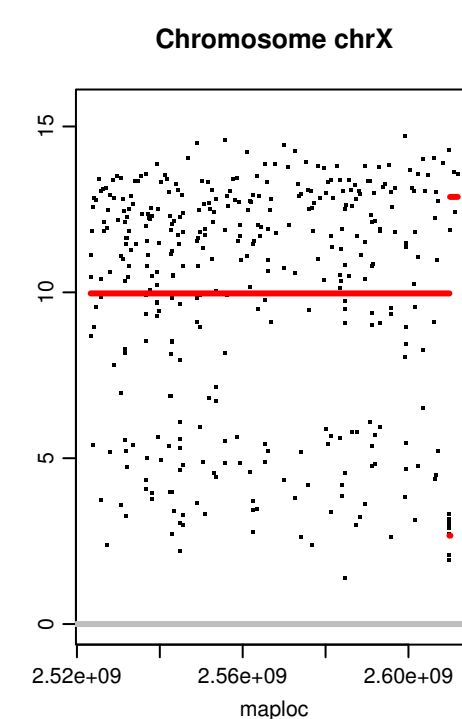

CPYB2

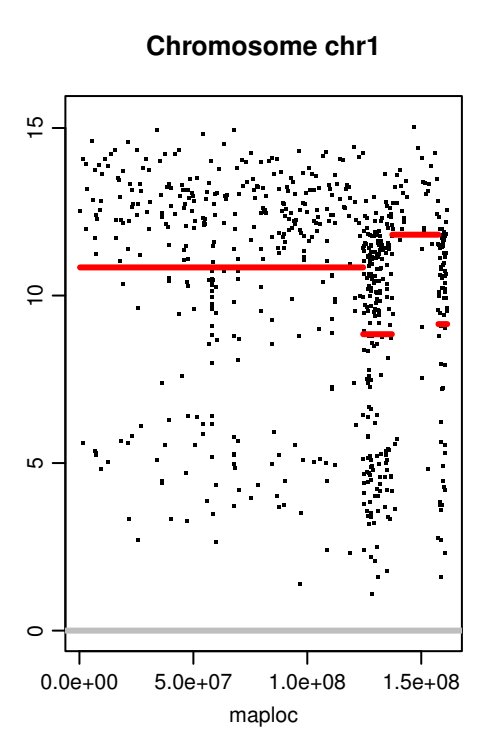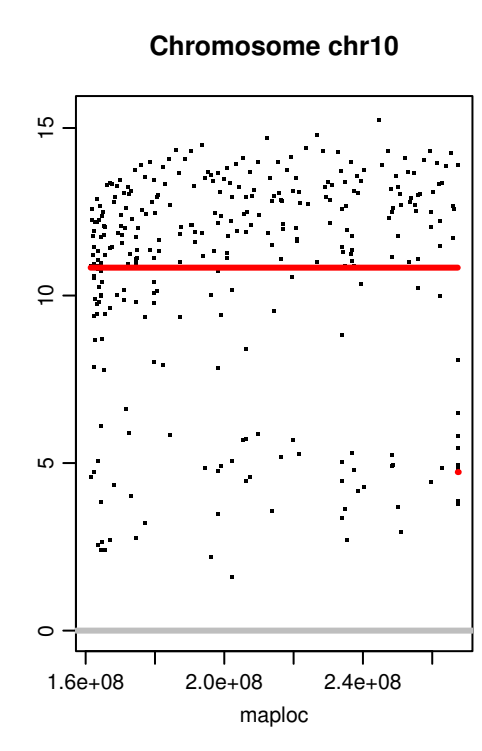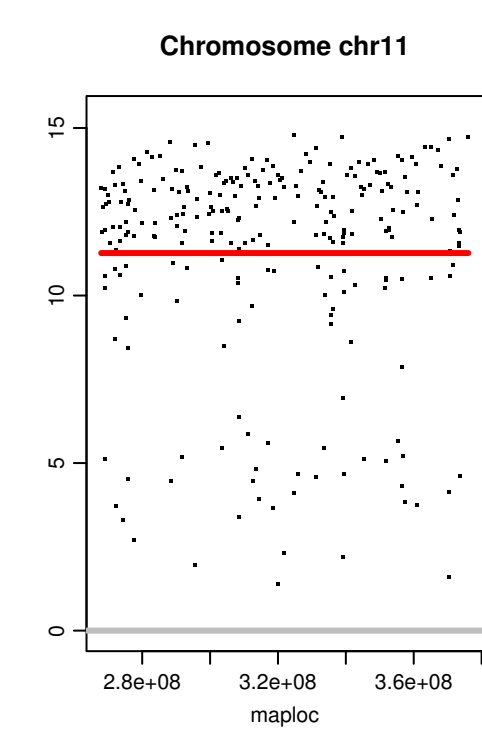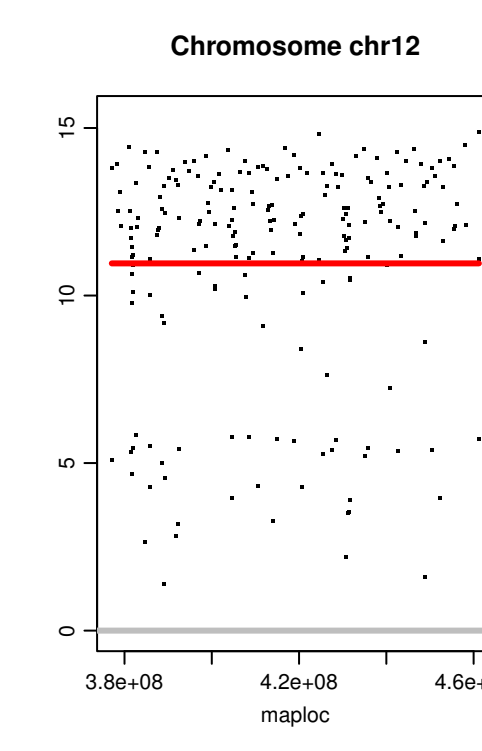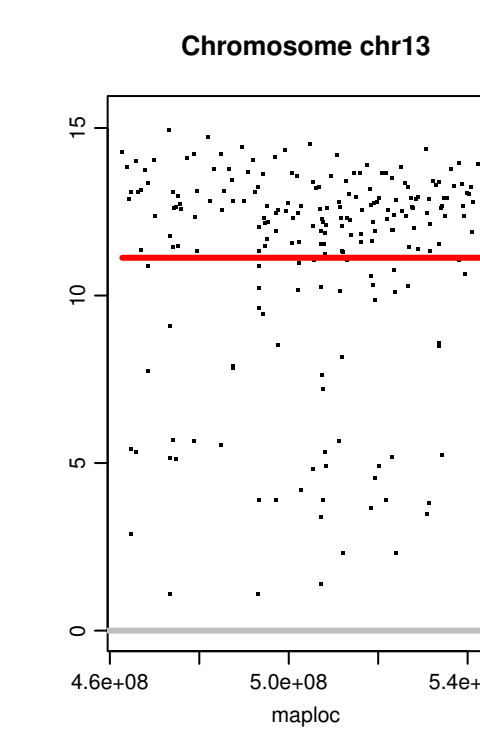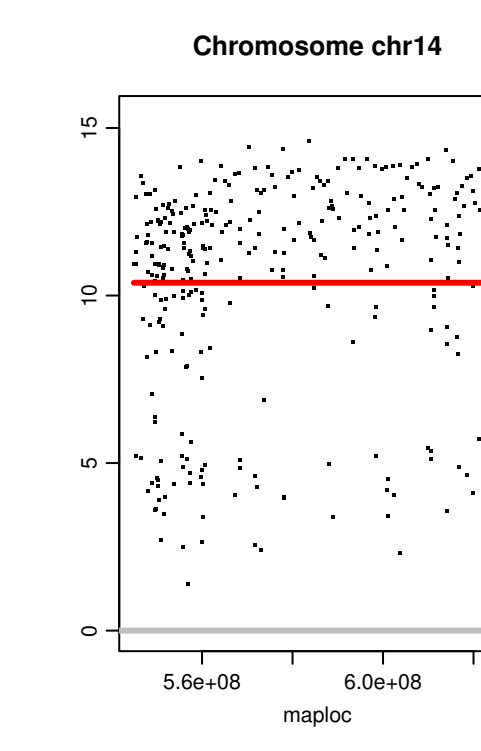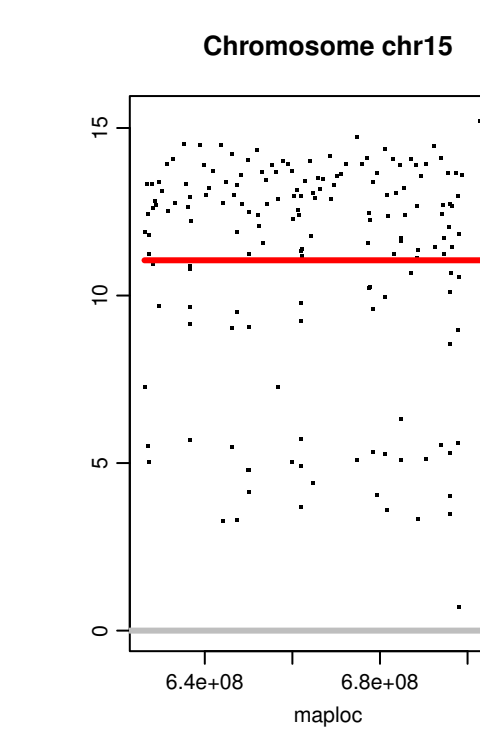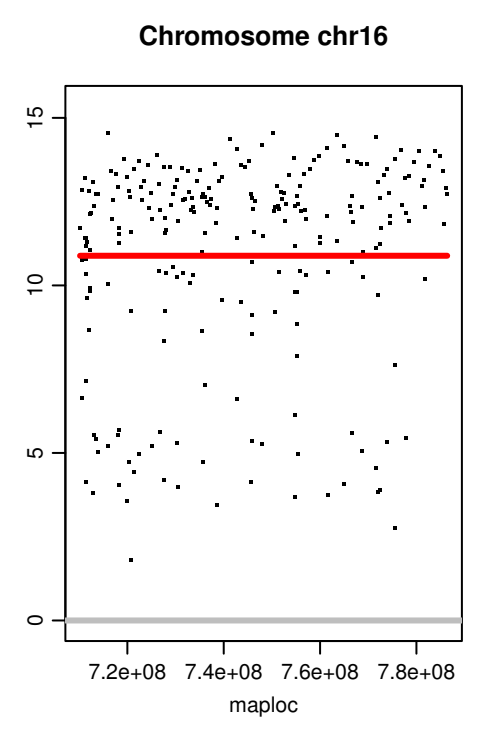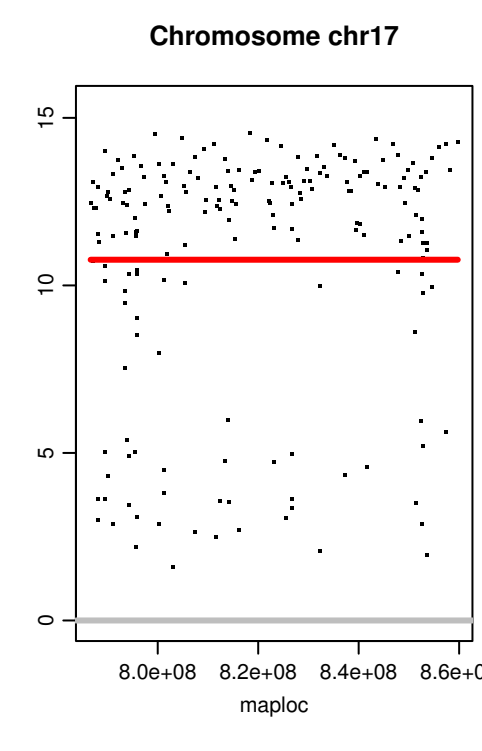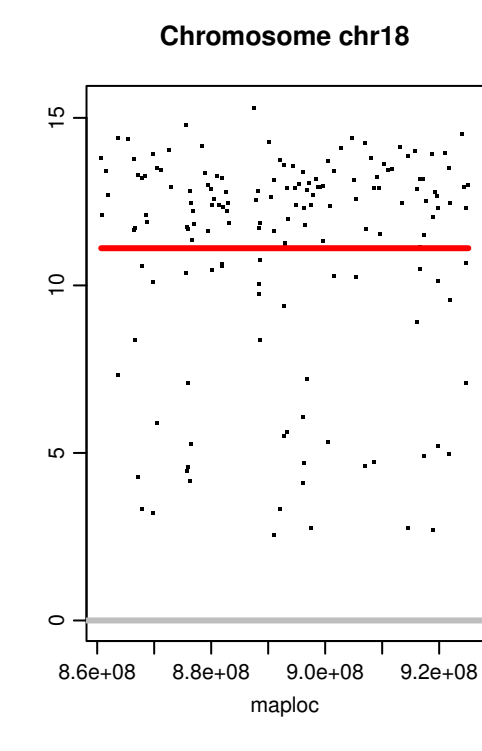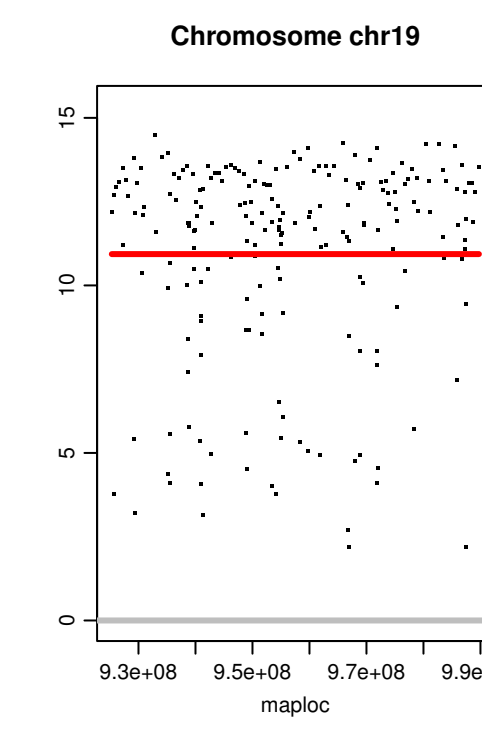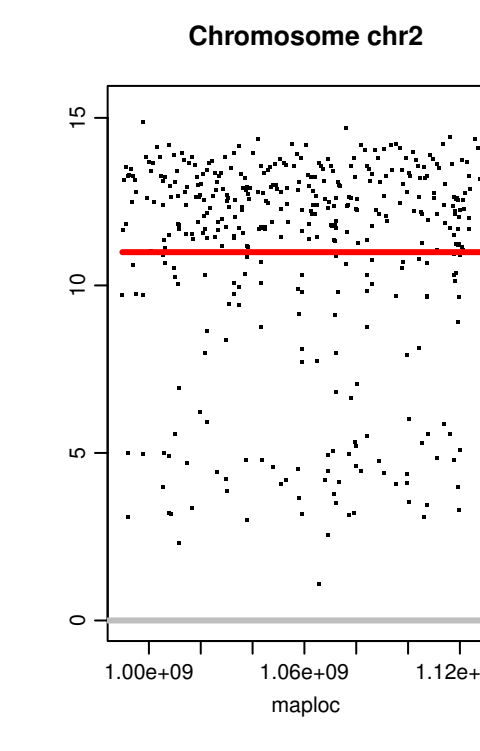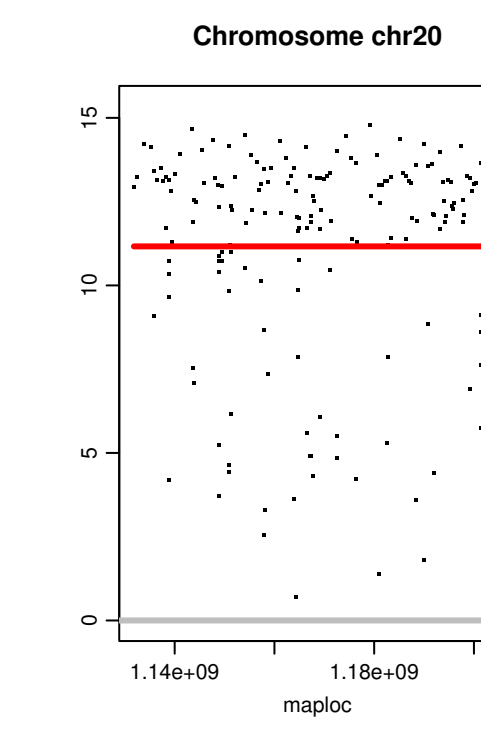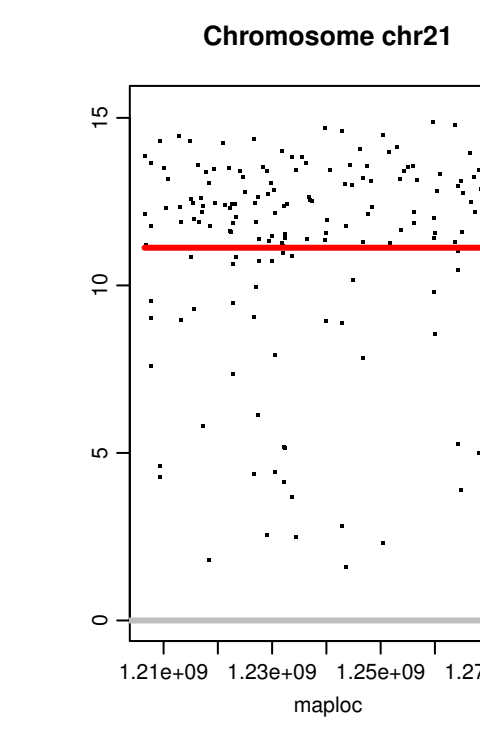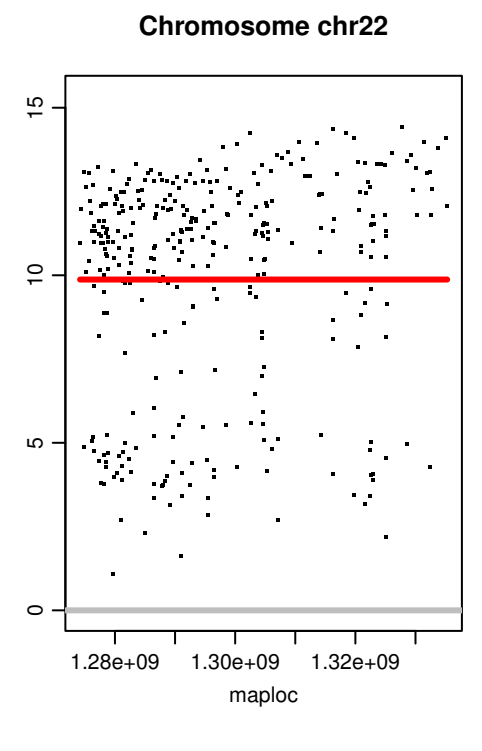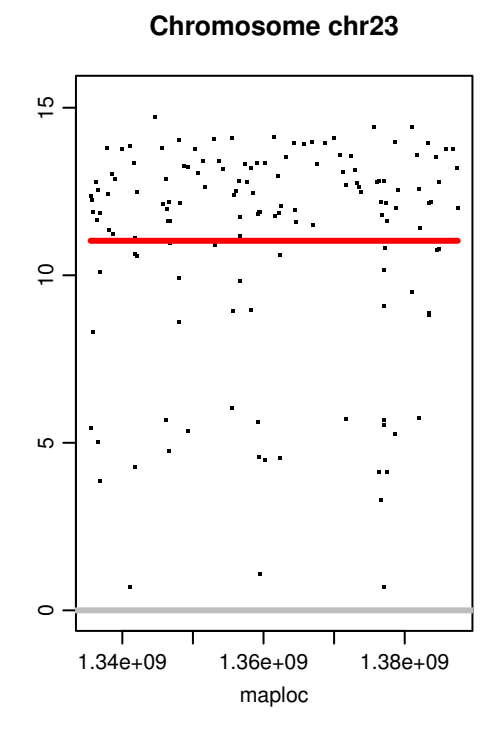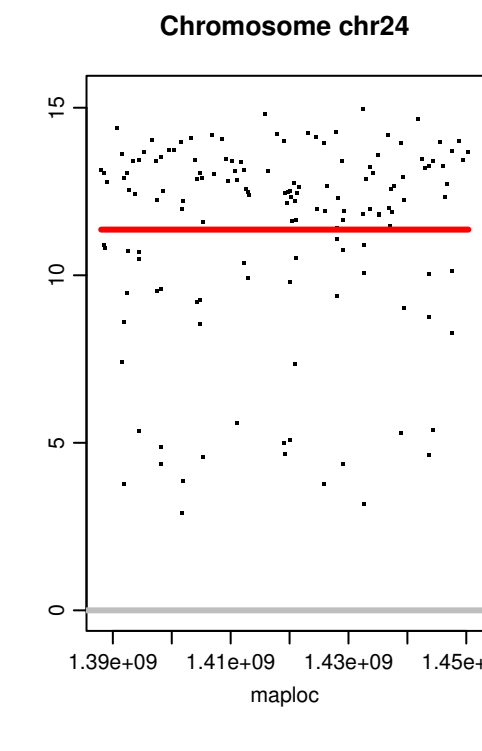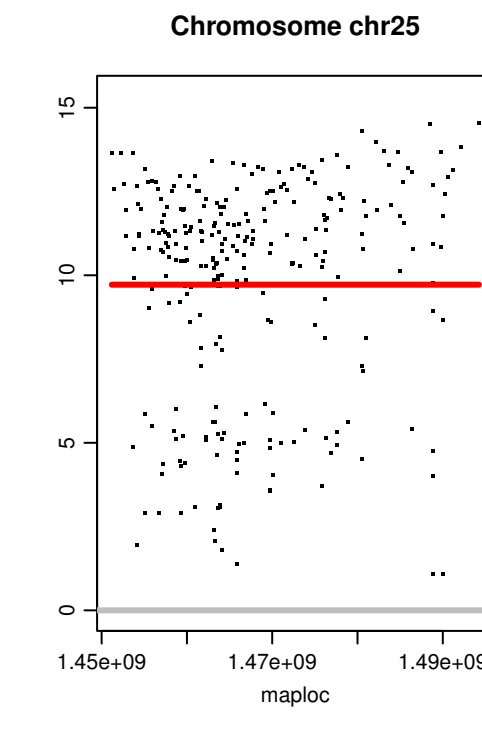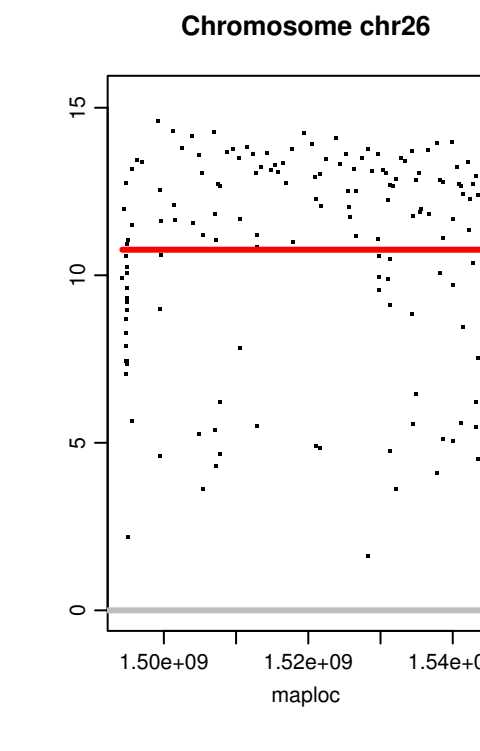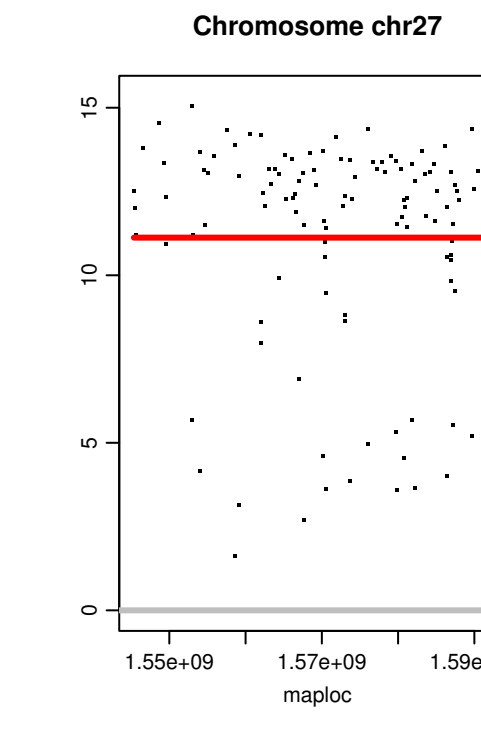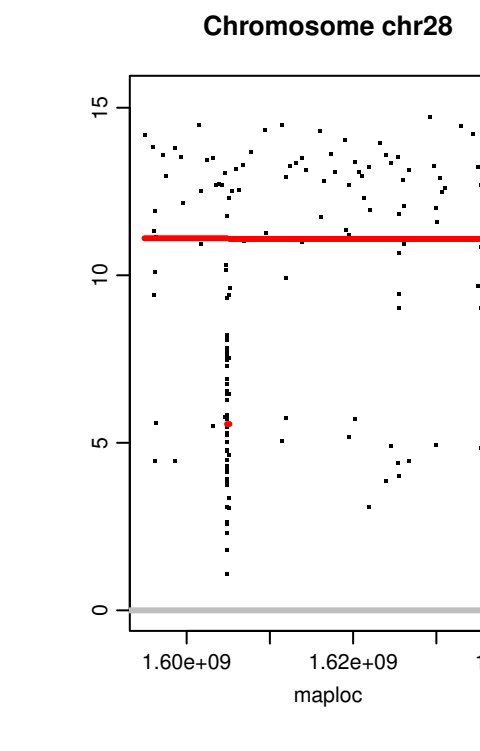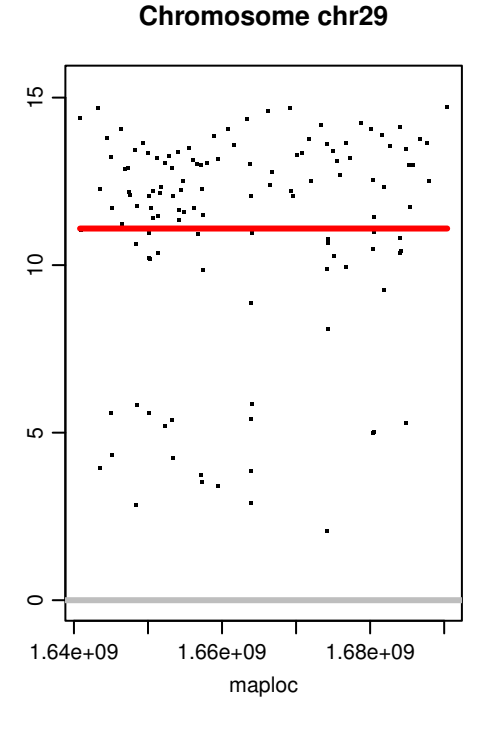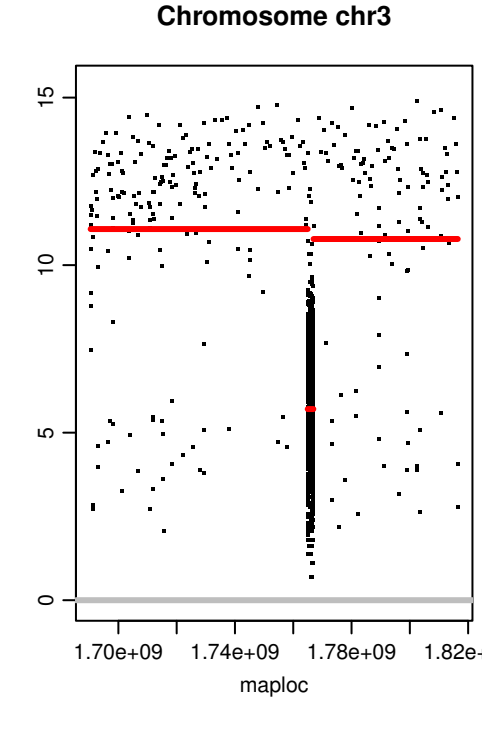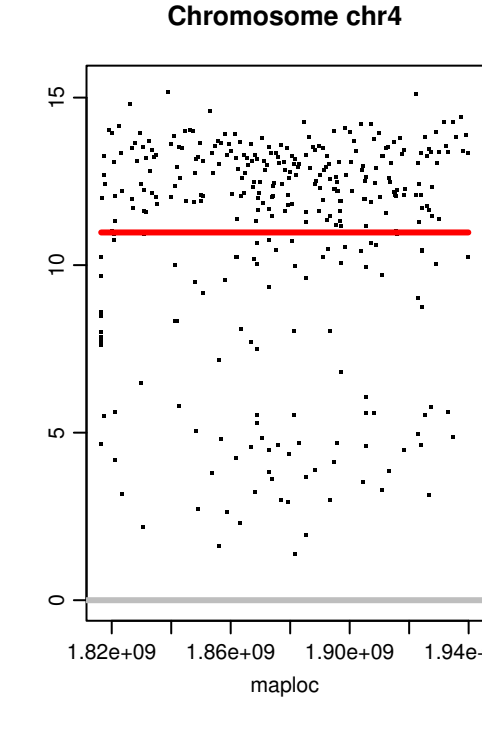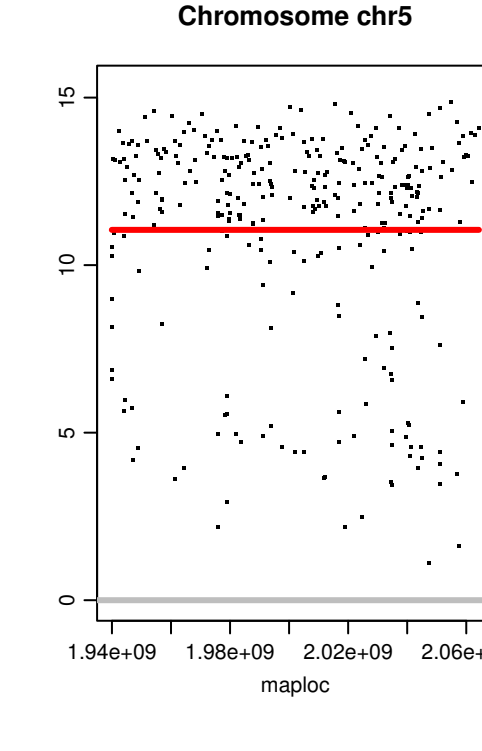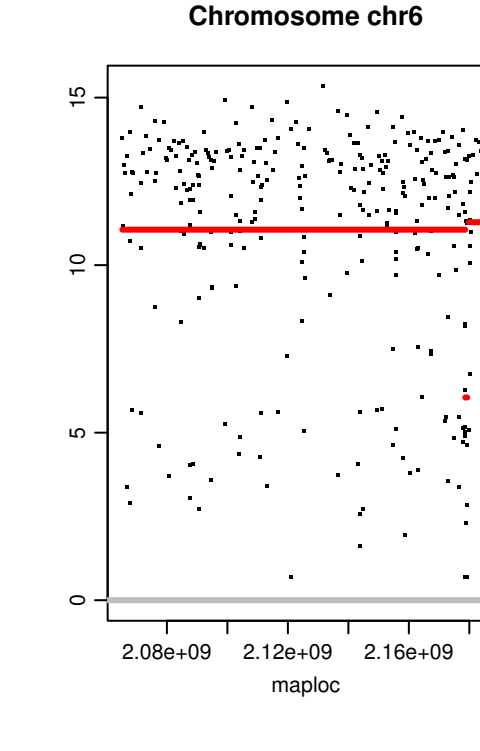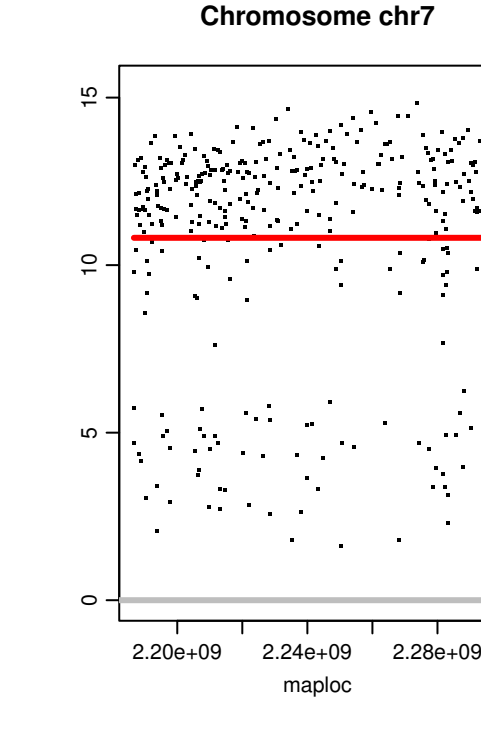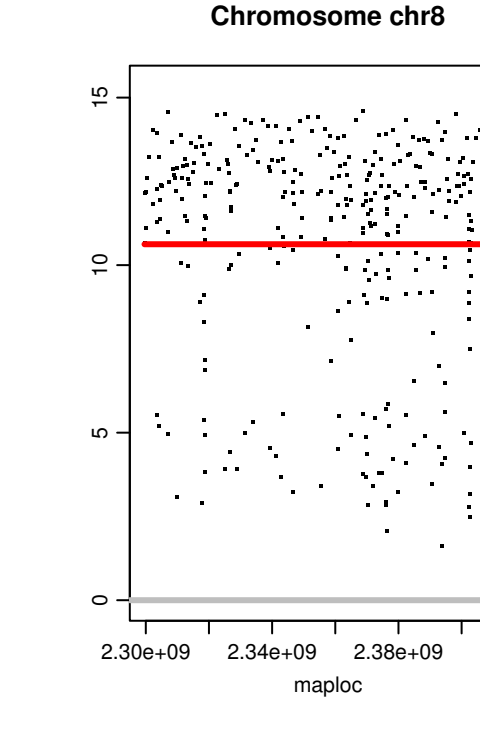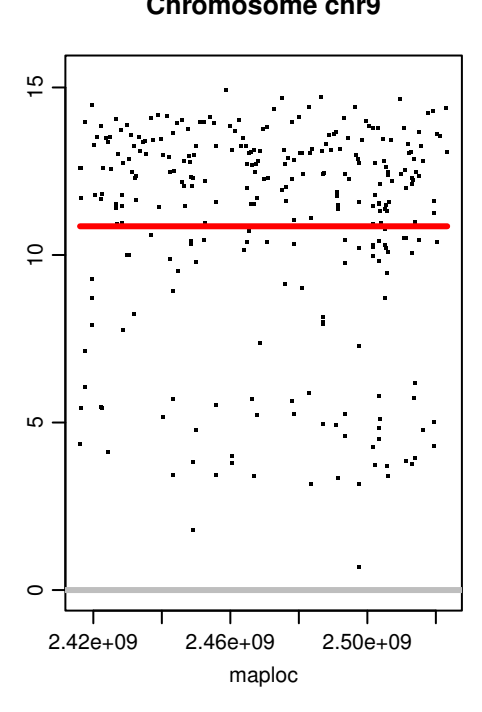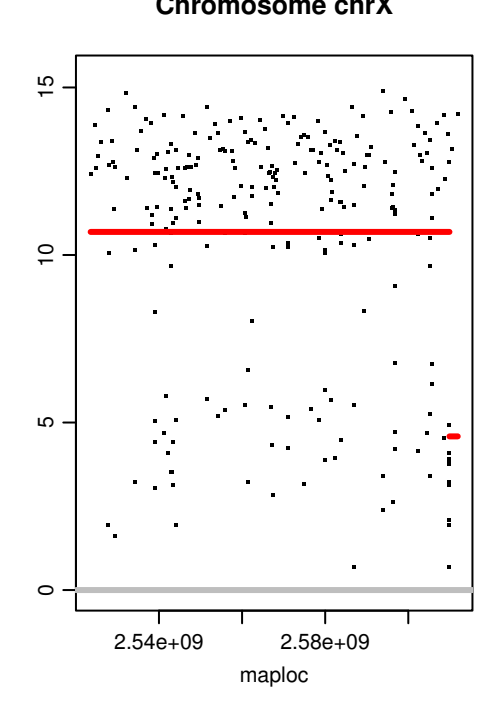

MGOB

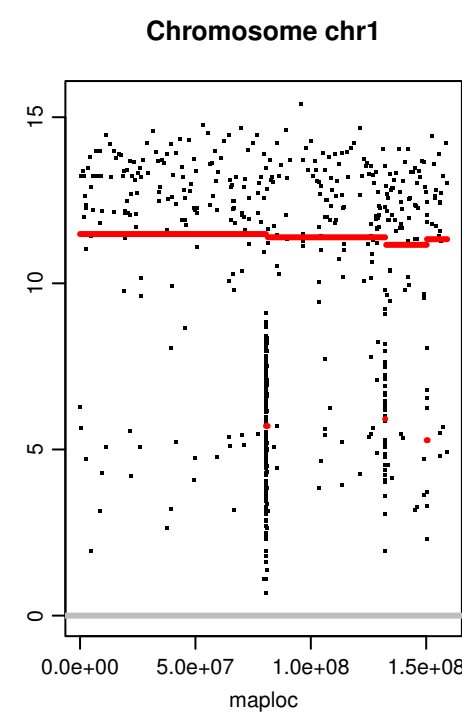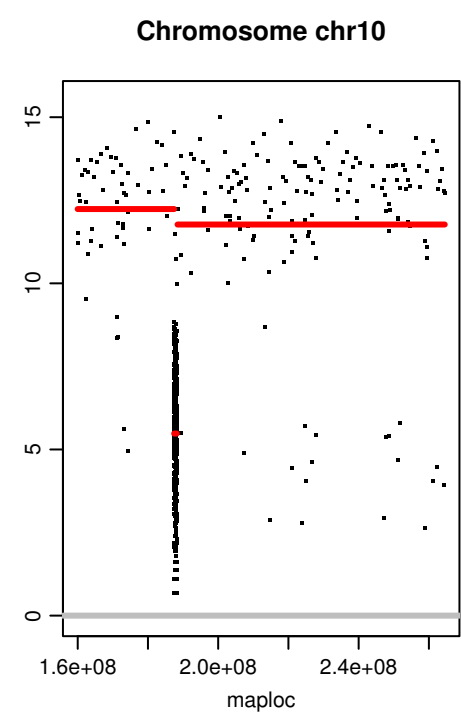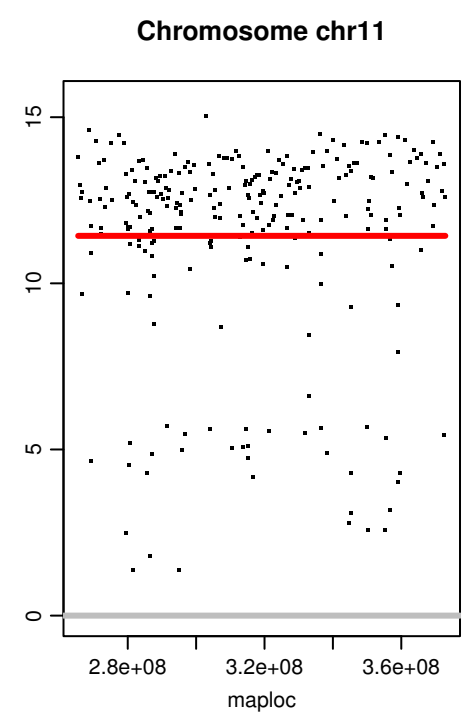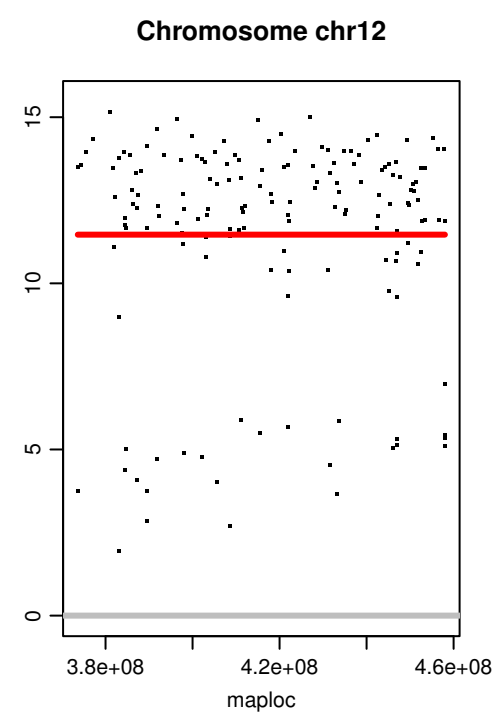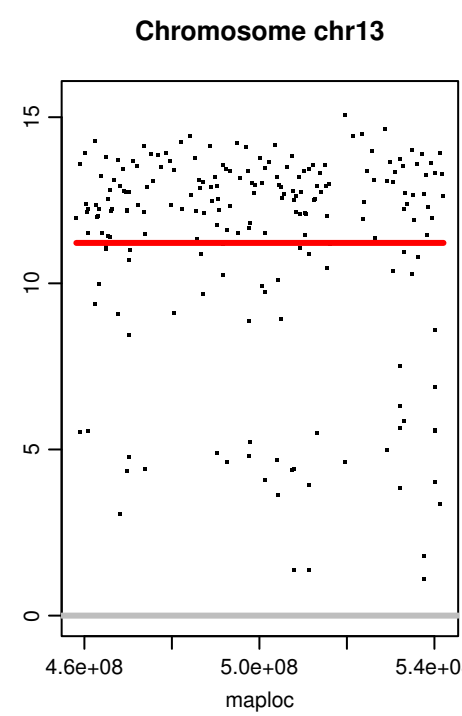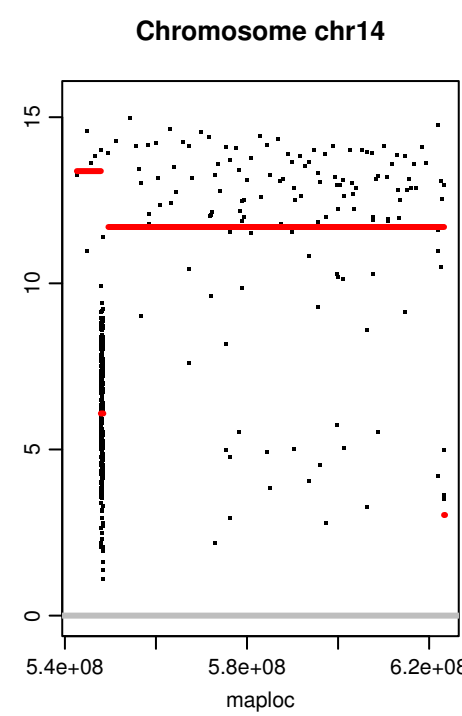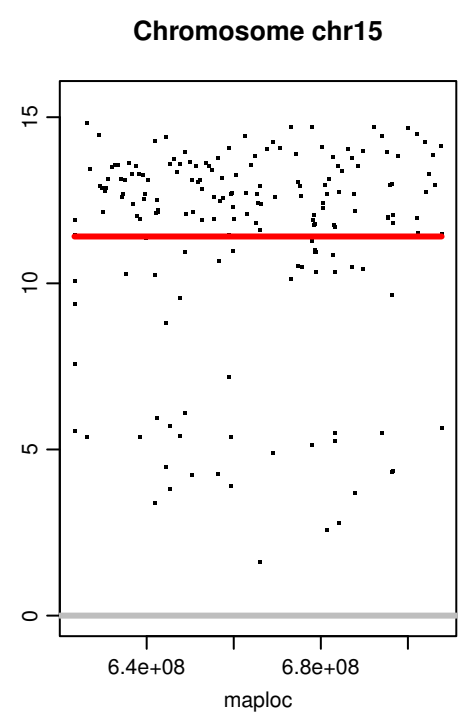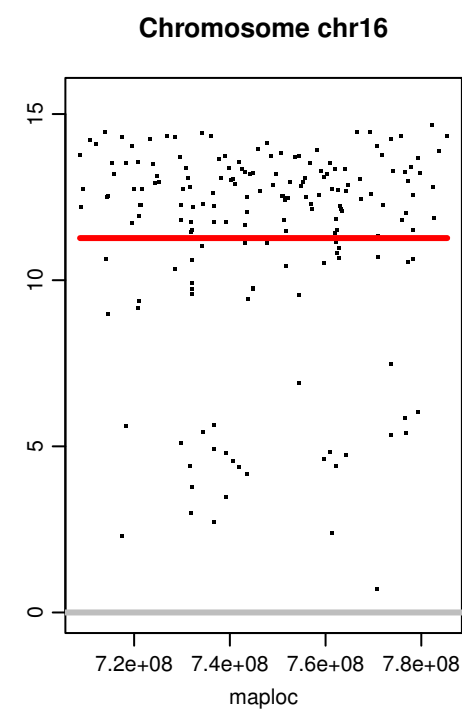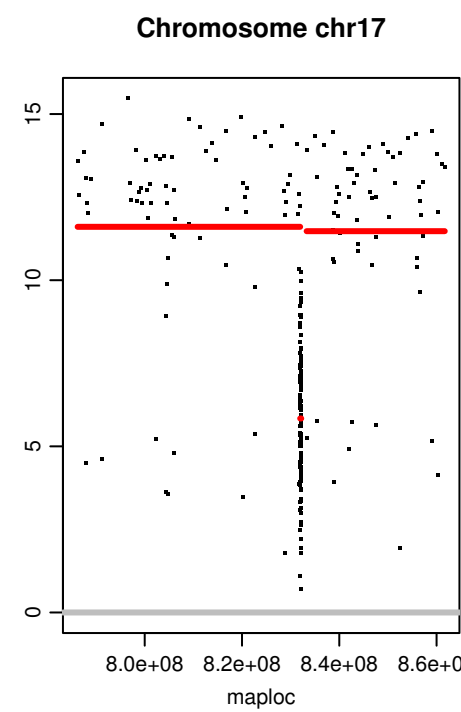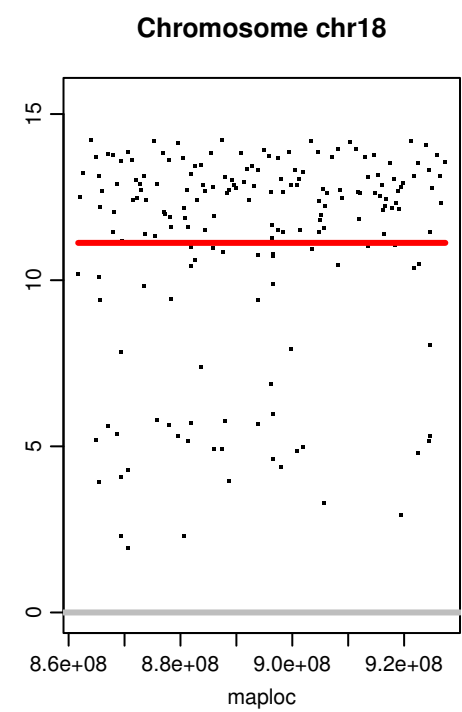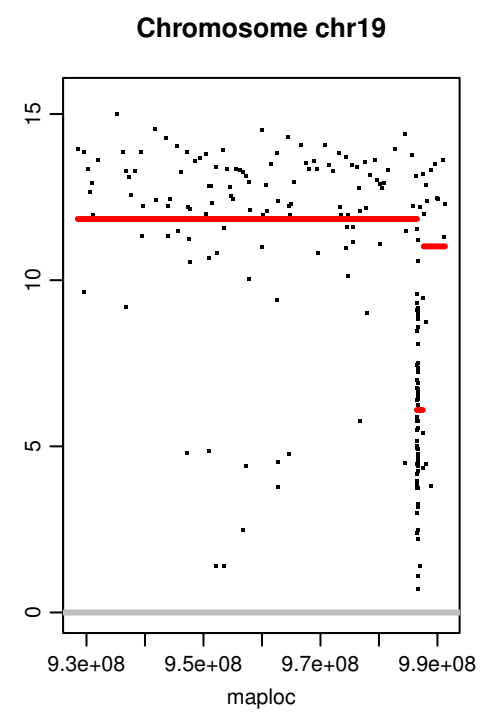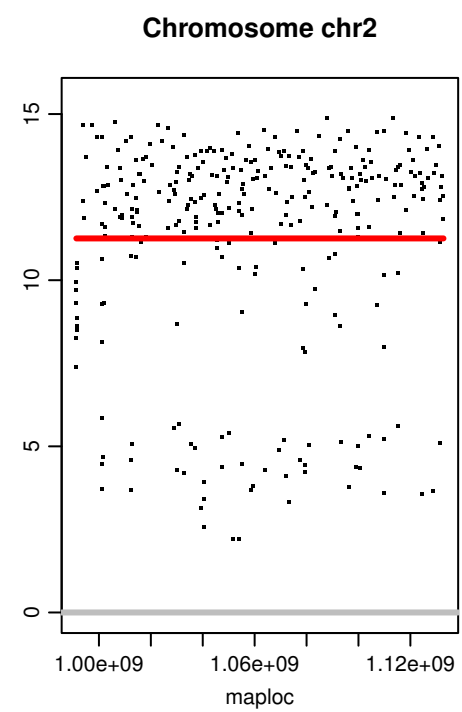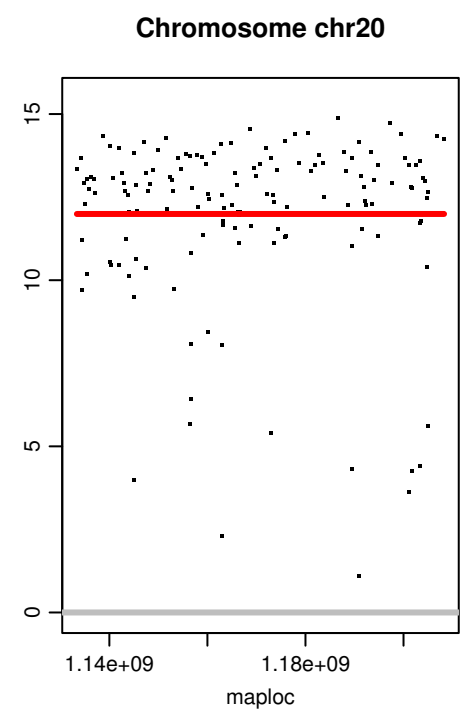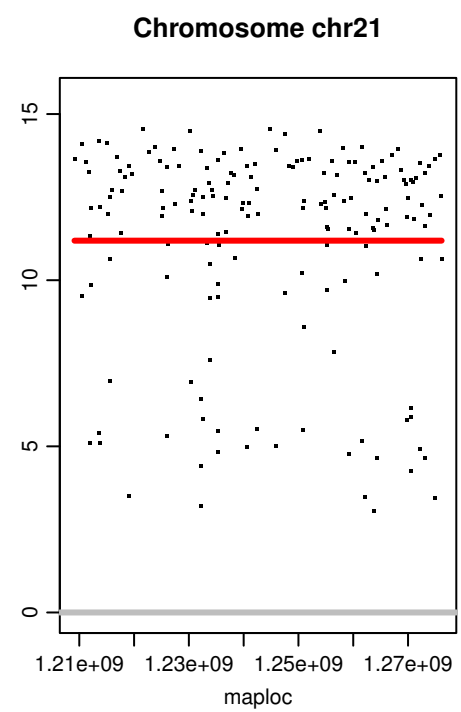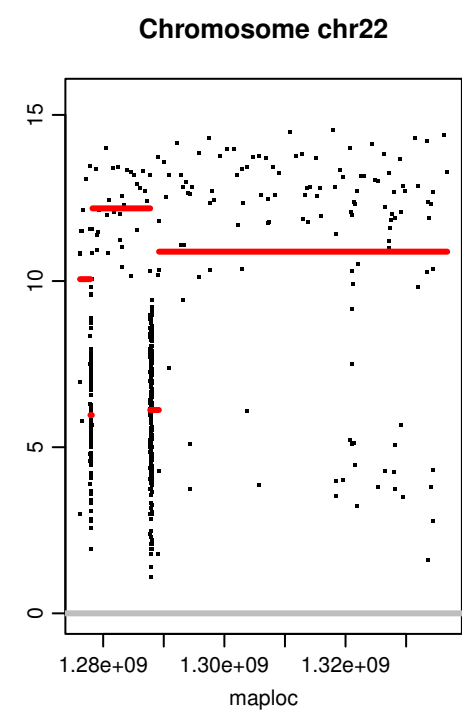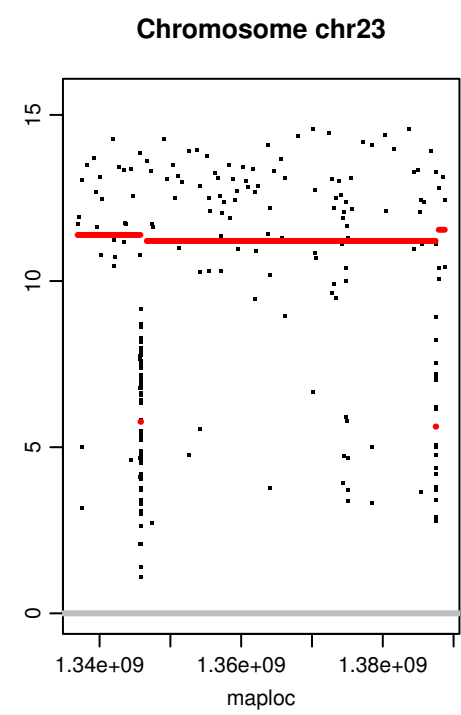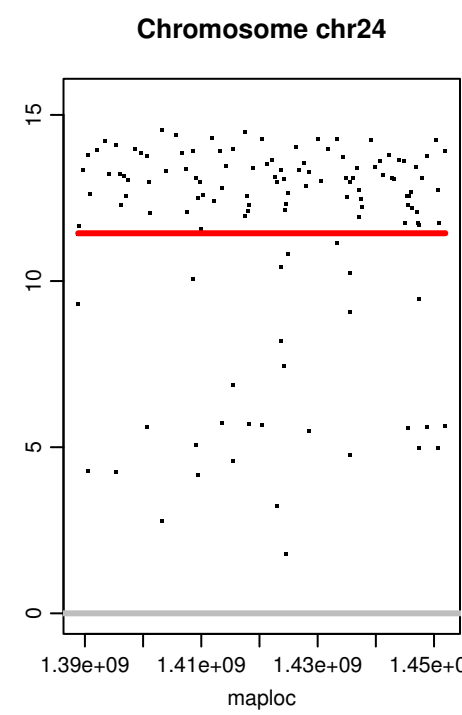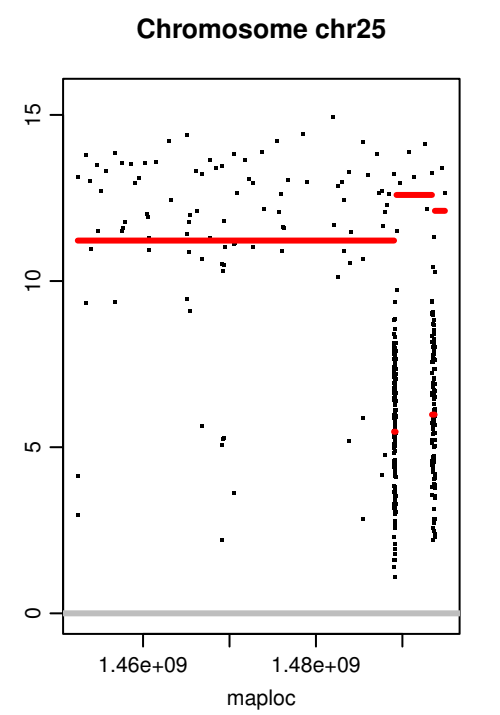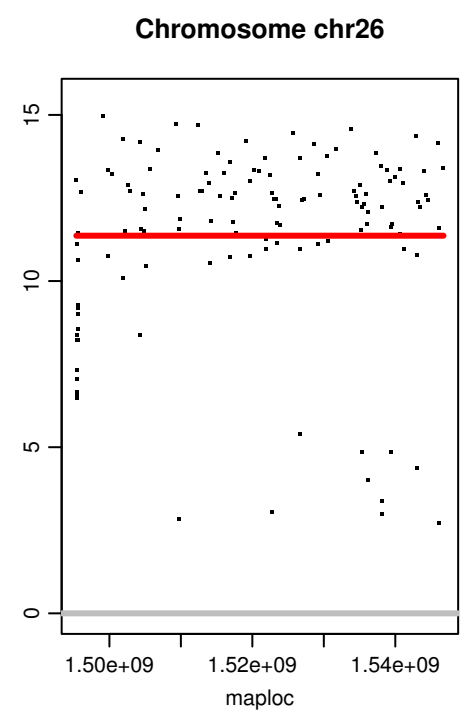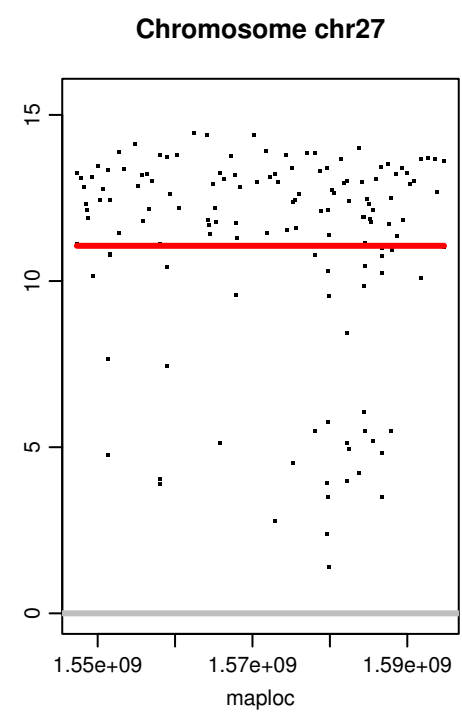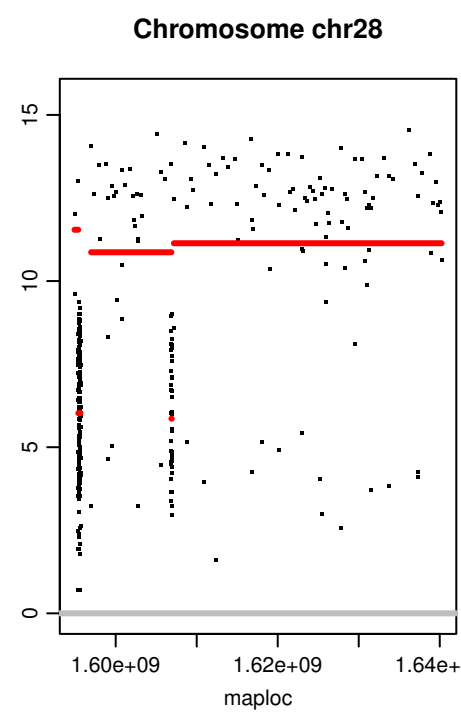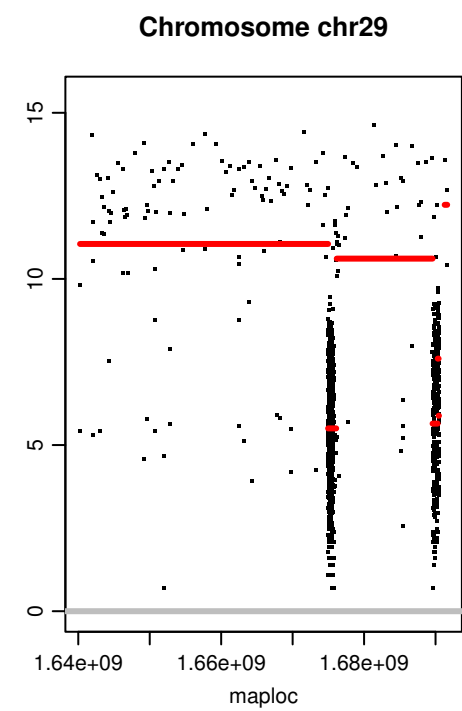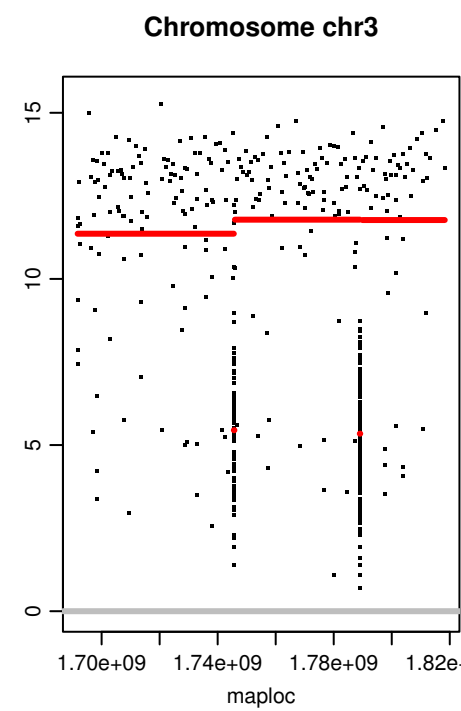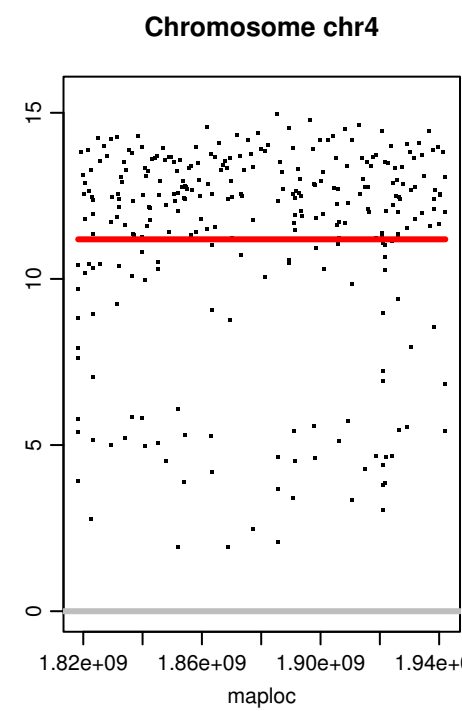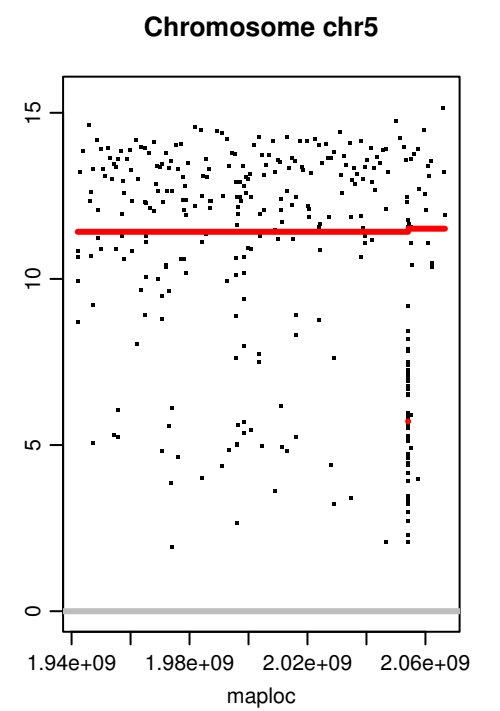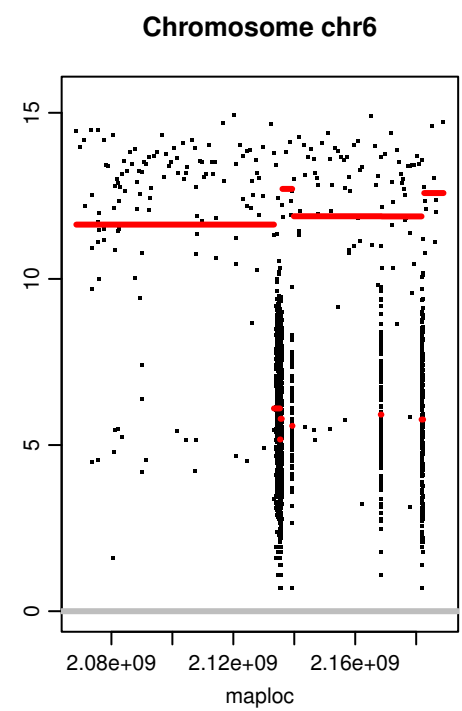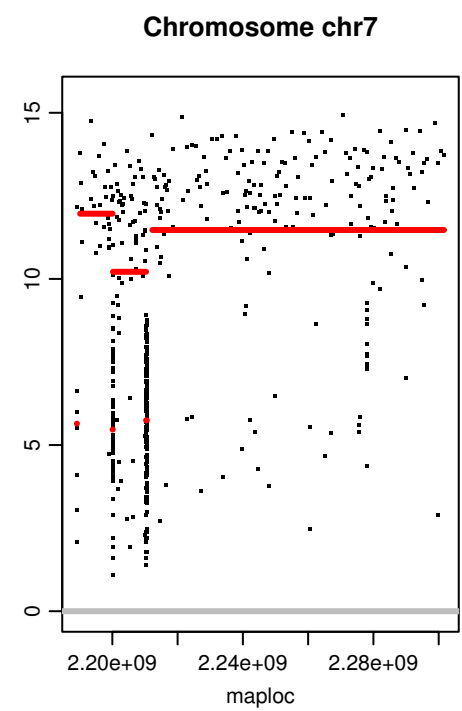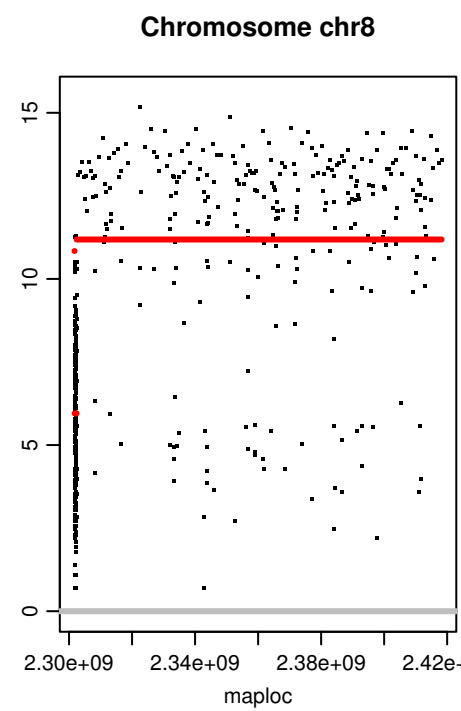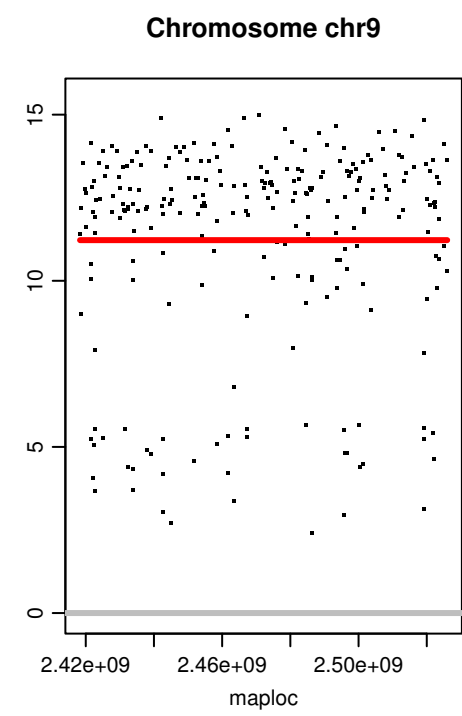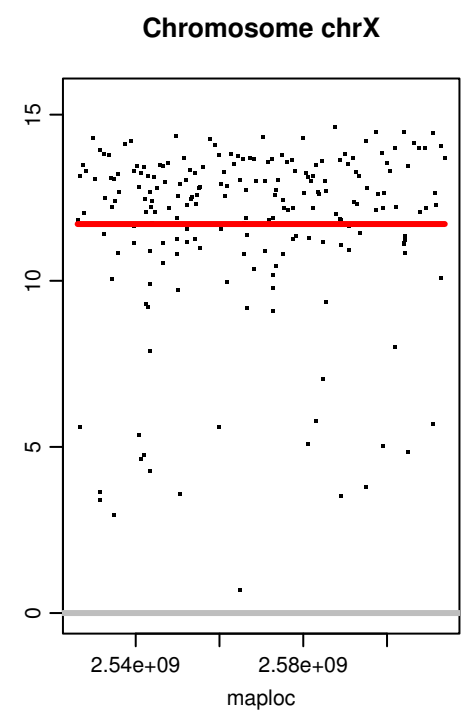

Supplement: 12864_2016_2933_MOESM2_ESM.pdf [file 12864_2016_2933_MOESM2_ESM.pdf]
